# Supplementary material for: Homocoupling of benzyl pyridyl ethers via visible light-mediated deoxygenation
Source: Royal Society of Chemistry journal article supplement (doi:10.1039/d3cc03002d), 2023-01-01

## Supporting Information

### Homocoupling of Benzyl Pyridyl Ethers via Visible Light-Mediated Deoxygenation

Jingtian Chen,<sup>‡</sup><sup>a</sup> Fan Wang,<sup>‡</sup><sup>a</sup> Xiang Li,<sup>b</sup> Lei Wang,<sup>a</sup> Wei Yu,<sup>a</sup> Keju Sun,<sup>\*c</sup> and Jingyue Yang<sup>\*a</sup>

<sup>a</sup> State Key Laboratory of Metastable Materials Science and Technology, Hebei Key Laboratory of Nanobiotechnology, Hebei Key Laboratory of Applied Chemistry, Yanshan University, Qinhuangdao, 066004, China

<sup>b</sup> Qinhuangdao Customs Technical Center, Qinhuangdao, 066004, China

<sup>c</sup> Hebei Key Laboratory of Applied Chemistry, Yanshan University, Qinhuangdao, P. R. China

\*E-mail: kjsun@ysu.edu.cn

\*E-mail: [yangjingyue@ysu.edu.cn](mailto:yangjingyue@ysu.edu.cn)

## Table of Contents

|                                                                                            |            |
|--------------------------------------------------------------------------------------------|------------|
| <b>1. General information</b> .....                                                        | <b>S3</b>  |
| <b>2. Photoreaction setup</b> .....                                                        | <b>S3</b>  |
| <b>3. General synthetic procedures</b> .....                                               | <b>S4</b>  |
| 3.1 Preparation of Pyridyl Ethers .....                                                    | S4         |
| 3.2 Preparation of Pyridinium Salts 2a .....                                               | S5         |
| 3.3 Homocoupling of Benzyl Pyridyl Ethers via Visible Light-Mediated<br>Deoxygenation..... | S5         |
| <b>4. Mechanistic considerations</b> .....                                                 | <b>S7</b>  |
| 4.1 Radical trap experiment .....                                                          | S7         |
| 4.2 Radical addition experiment with styrene .....                                         | S7         |
| 4.3 The radical cross-coupling experiment .....                                            | S7         |
| 4.4 Light on-off experiment .....                                                          | S8         |
| <b>5. Computational calculation</b> .....                                                  | <b>S9</b>  |
| <b>6. Scope and characterization of key compounds</b> .....                                | <b>S17</b> |
| <b>References</b> .....                                                                    | <b>S24</b> |
| <b>NMR SPECTR</b> .....                                                                    | <b>S25</b> |

## 1. General information

All solvents and commercially available reagents were purchased as reagent grade and were used without further purification, unless otherwise stated. Reactions were monitored by thin layer chromatography (TLC) and visualized using UV-light or  $\text{KMnO}_4$  stain as a developing agent. Column chromatography was performed using silica gel (200-300 mesh). Solvent removal was carried out by RE-52AA rotary evaporator under reduced pressure. The  $^1\text{H}$  NMR and  $^{13}\text{C}$  NMR spectra were recorded on a 400 MHz Bruker Avance III using  $\text{CDCl}_3$  as the deuterated solvent. The chemical shifts ( $\delta$ ) were reported in parts per million (ppm), referenced relative to TMS (0 ppm for  $^1\text{H}$  NMR),  $\text{CDCl}_3$  (7.26 ppm for  $^1\text{H}$  NMR),  $\text{CDCl}_3$  (77.0 ppm for  $^{13}\text{C}$  NMR). Coupling constants ( $J$ ) are reported in hertz (Hz). The following abbreviations are used for spin multiplicity: s, singlet; d, doublet; t, triplet; dt, doublet of triplets; td, triplet of doublets; dd, doublet of doublets; ddd, doublet of doublet of doublets; m, multiplet; app, apparent. IR spectra were recorded on an FT-IR NICOLET iS10 spectrometer. HRMS were recorded on a Thermo Scientific LTQ Orbitrap Discovery spectrometer (ESI). LC-MS were recorded on a Agilent 1290II-6460 spectrometer (ESI). GC-MS analyses were performed using Agilent 7890B-5977A spectrometer gas chromatograph with FID detector and Zebron ZB 5MSi column.

## 2. Photoreaction setup

Photoredox reactions were carried out in the YM-GHX-V type photochemical reactor purchased from Shanghai YuMing Instrument CO.LTD. The reactor used the 50 mL round quartz tube matched with the instrument. The distance between the light source and the reaction tube is about 3 cm. Blue light –  $\lambda_{\text{max}} = 450\text{-}455$  nm, 30W\*1.

### 3. General synthetic procedures

#### 3.1 Preparation of Pyridyl Ethers

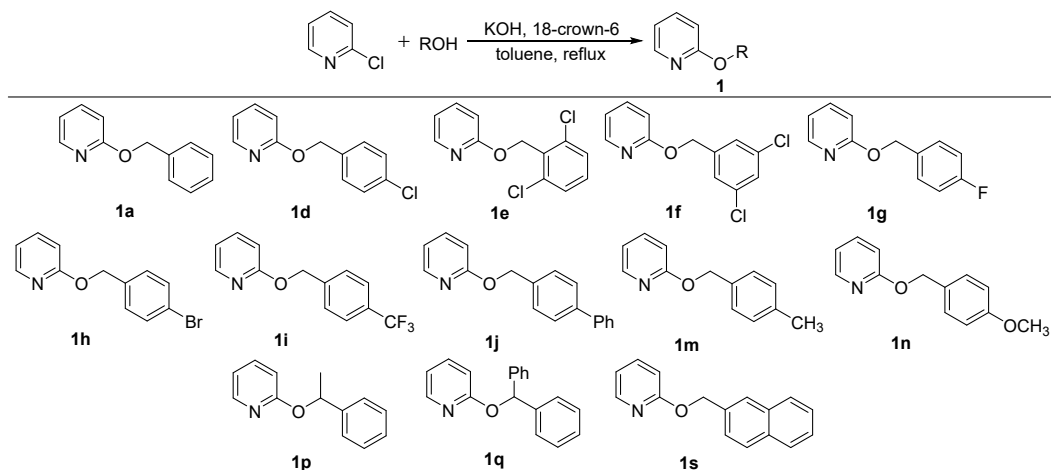

The above pyridyl ethers were obtained using the literature procedure by Dudley<sup>1</sup> and Yang<sup>2</sup>. A 50 mL, round-bottomed flask equipped with a magnetic stirring bar with reflux condenser was charged with 2-chloropyridine (0.95 ml, 10 mmol, 1.0 equiv), alcohol (15 mmol, 1.5 equiv), potassium hydroxide (1.85 g, 33 mmol, 3.3 equiv), 18-crown-6 (135 mg, 0.5 mmol, 0.05 equiv) and toluene (20 mL). The reaction mixture was heated to reflux with a heating mantle. The reaction was monitored by TLC until completion or no obvious progress observed then allowed to cool to room temperature. The resulting mixture was diluted with H<sub>2</sub>O and extracted with EtOAc. The combined organic extract was then washed with brine, dried (Na<sub>2</sub>SO<sub>4</sub>), filtered, concentrated under vacuum, and purified on silica gel to provide the above pyridyl ethers.

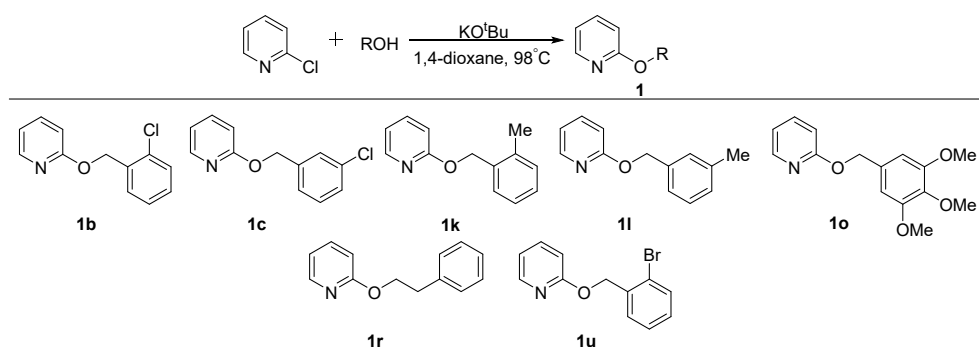

The above pyridyl ethers were obtained using the literature procedure by Anderson.<sup>3</sup> A 150mL, round-bottomed flask equipped with a magnetic stirring bar with reflux condenser was charged with 2-



**2a** as white solid (0.5 g, 94%).

### 3.3 Homocoupling of Benzyl Pyridyl Ethers via Visible Light-Mediated Deoxygenation

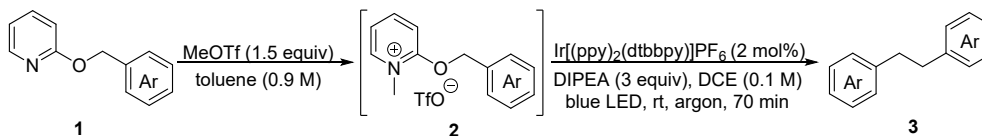

A 50 mL quartz reaction tube equipped with a stirring bar and sealed with septum was charged with benzyl pyridyl ether **1** (0.4 mmol, 1.0 equiv), then degassed and backfilled with argon for three times. Toluene (0.44 mL, 0.9 M) was added via syringe and the resulting mixture was cooled to 0°C, then the MeOTf (68 μL, 0.6 mmol, 1.5 equiv) was added dropwise while stirring, followed by stirring at room temperature for another 1 h. After the reaction was completed, the toluene was removed in vacuo. Ir[(ppy)<sub>2</sub>(dtbbpy)]PF<sub>6</sub> (8 mg, 8 μmol, 2.0 mol%) was added, then the resulting mixture was degassed and backfilled with argon for three times. Subsequently, DIPEA (0.21 mL, 1.2 mmol, 3 equiv) and DCE (4 mL, 0.1 M) were added with syringe under the protection of argon, placed in a photoreactor and irradiated with a 30 W blue LED (see section 2) for 70 min. After this time, the mixture was diluted with EtOAc, transferred to a round-bottomed flask, and concentrated in vacuo. The crude product was purified by thin layer chromatography to afford product **3**.

## 4. Mechanistic considerations

### 4.1 Radical trap experiment

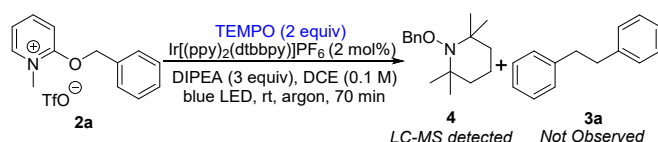

The reaction was set up according to standard conditions using pyridinium salt **2a** as the starting material on 0.1 mmol scale. Subsequently, 2.0 equivalents of TEMPO [2,2,6,6-tetramethylpiperidinoxy] were added. After 70 min of blue LED irradiation, the reaction mixture was examined using LC-MS indicating a presence of benzylated TEMPO **4**. The coupling product **3a** was not observed.

### 4.2 Radical addition experiment with styrene

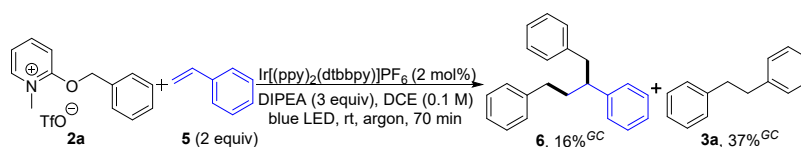

The reaction was set up according to standard conditions using pyridinium salt **2a** as the starting material on 0.4 mmol scale. Subsequently, 2.0 equivalents of styrene **5** were added. After 70 min of blue LED irradiation, 20  $\mu$ L tetradecane was added as an internal standard. The reaction mixture was examined using GC-MS indicating the cross-coupling product **6** was produced in 16% yield and the homocoupling product **3a** was produced in 37% yield.

### 4.3 The radical cross-coupling experiment

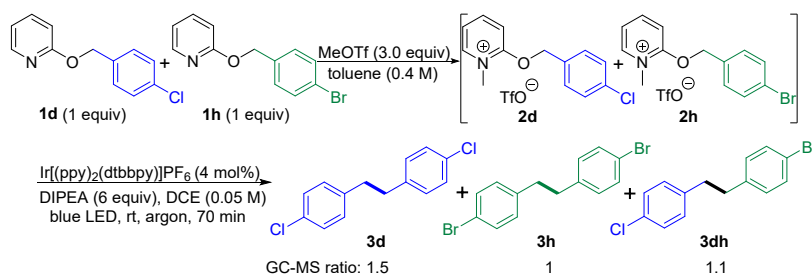

The radical cross-coupling experiment was performed with 0.1 mmol pyridyl ethers **1d** and 0.1 mmol pyridyl ethers **1h** as reaction materials. After 70 min of blue LED irradiation, 20  $\mu$ L tetradecane was

added as an internal standard and the reaction mixture was examined using GC-MS. The reaction yielded three coupling products, including homocoupling product **3d**, homocoupling product **3h** and the cross-coupling product **3dh**, with a GC-MS ratio of 1.5:1:1.1.

#### 4.4 Light on-off experiment

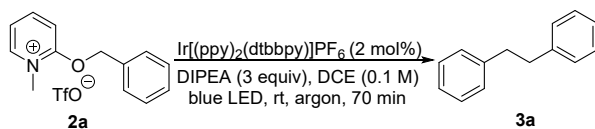

The reaction was set up according to standard condition on 0.1 mmol scale with addition of tetradecane (20  $\mu$ l) as an internal standard. The reaction was conducted for 1 h under alternating periods of irradiation (blue LED) and darkness meanwhile monitored by GC-MS.

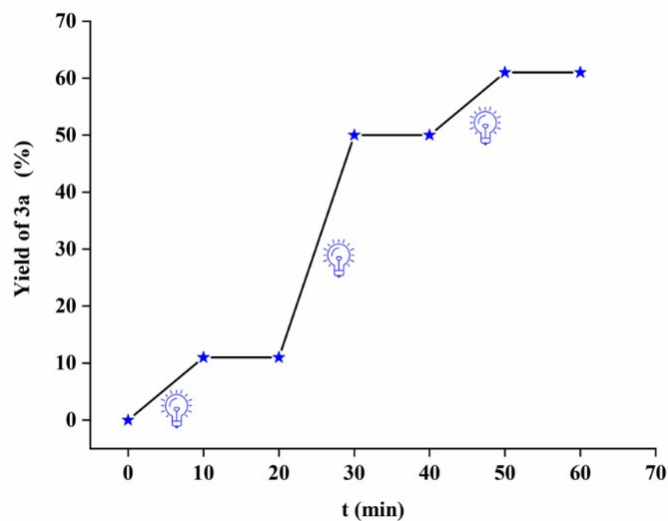

**Figure S1.** Light on-off experiment.



## 5. Computational calculation

All calculations were performed using density functional theory (DFT) by *Gaussian16* software package, with B3LYP exchange-correlation functional. The basis set of 6-31+G (d, p) for all atoms was used for structural optimizations and frequency calculations. The polarizable continuum model (PCM) with dichloroethane as solvent was used. The Gibbs free energy was calculated for each structure. Gibbs free energy in Hartree and Cartesian coordinates in Å are given for each structure as the following.

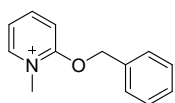

Gibbs free energy = -633.466045 Hartree

Cartesian coordinates:

|   |         |         |         |
|---|---------|---------|---------|
| C | -2.2684 | -1.4084 | -0.0004 |
| C | -3.6546 | -1.4465 | -0.0008 |
| C | -4.3934 | -0.2547 | -0.0006 |
| C | -3.7135 | 0.9417  | 0.0001  |
| H | -1.6882 | -2.3206 | -0.0006 |
| H | -4.1623 | -2.4049 | -0.0012 |
| H | -5.4757 | -0.2537 | -0.0009 |
| H | -4.2129 | 1.9017  | 0.0004  |
| C | -1.6481 | 2.2864  | 0.0014  |
| H | -2.3954 | 3.0760  | 0.0024  |
| H | -1.0228 | 2.3587  | 0.8913  |
| H | -1.0235 | 2.3603  | -0.8889 |
| C | -1.6178 | -0.1674 | 0.0002  |
| C | 0.6086  | -1.1121 | -0.0000 |
| H | 0.3995  | -1.7022 | -0.8955 |
| H | 0.3998  | -1.7026 | 0.8952  |
| C | 2.0089  | -0.5738 | -0.0001 |

|   |         |         |         |
|---|---------|---------|---------|
| C | 2.6673  | -0.3157 | -1.2110 |
| C | 2.6684  | -0.3180 | 1.2106  |
| C | 3.9659  | 0.1986  | -1.2116 |
| H | 2.1650  | -0.5210 | -2.1527 |
| C | 3.9670  | 0.1963  | 1.2111  |
| H | 2.1669  | -0.5252 | 2.1523  |
| C | 4.6163  | 0.4559  | -0.0003 |
| H | 4.4702  | 0.3928  | -2.1533 |
| H | 4.4721  | 0.3886  | 2.1527  |
| H | 5.6277  | 0.8513  | -0.0004 |
| N | -2.3532 | 0.9839  | 0.0006  |
| O | -0.3109 | 0.0400  | 0.0005  |

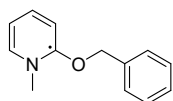

Gibbs free energy = -633.458284 Hartree

Cartesian coordinates:

|   |         |         |         |
|---|---------|---------|---------|
| C | 2.2324  | -1.3991 | 0.0990  |
| C | 3.6661  | -1.4944 | 0.1242  |
| C | 4.4018  | -0.2998 | 0.0313  |
| C | 3.7661  | 0.9131  | -0.1044 |
| H | 1.6280  | -2.2931 | 0.1789  |
| H | 4.1506  | -2.4562 | 0.2418  |
| H | 5.4873  | -0.3081 | 0.0657  |
| H | 4.2876  | 1.8568  | -0.1955 |
| C | 1.6226  | -0.1800 | -0.0374 |
| C | -0.6059 | -1.0700 | 0.0741  |
| H | -0.3903 | -1.5721 | 1.0242  |
| H | -0.4234 | -1.7725 | -0.7470 |
| N | 2.3588  | 0.9964  | -0.2026 |

|   |         |         |         |
|---|---------|---------|---------|
| C | 1.7313  | 2.3038  | -0.0255 |
| H | 2.3757  | 3.0573  | -0.4828 |
| H | 0.7593  | 2.3277  | -0.5149 |
| H | 1.6012  | 2.5510  | 1.0386  |
| C | -2.0200 | -0.5538 | 0.0420  |
| C | -2.7163 | -0.4610 | -1.1714 |
| C | -2.6548 | -0.1478 | 1.2245  |
| C | -4.0230 | 0.0338  | -1.2045 |
| H | -2.2346 | -0.7797 | -2.0923 |
| C | -3.9610 | 0.3479  | 1.1951  |
| H | -2.1251 | -0.2222 | 2.1708  |
| C | -4.6470 | 0.4400  | -0.0205 |
| H | -4.5531 | 0.0985  | -2.1502 |
| H | -4.4432 | 0.6572  | 2.1178  |
| H | -5.6638 | 0.8213  | -0.0442 |
| O | 0.2847  | 0.0579  | -0.0690 |

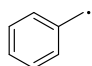

Gibbs free energy = -270.834703 Hartree

Cartesian coordinates:

|   |         |         |         |
|---|---------|---------|---------|
| C | 1.8519  | 0.0000  | 0.0000  |
| C | 1.1473  | 1.2077  | -0.0000 |
| C | -0.2508 | 1.2075  | -0.0000 |
| C | -0.2508 | -1.2075 | 0.0000  |
| C | 1.1473  | -1.2077 | 0.0000  |
| H | 2.9382  | 0.0000  | 0.0000  |
| H | 1.6846  | 2.1522  | -0.0000 |
| H | -0.7904 | 2.1507  | -0.0000 |
| H | -0.7904 | -2.1507 | 0.0000  |

|   |         |         |         |
|---|---------|---------|---------|
| H | 1.6846  | -2.1522 | 0.0000  |
| C | -0.9745 | 0.0000  | -0.0000 |
| C | -2.4538 | 0.0000  | 0.0000  |
| H | -3.0131 | 0.0000  | 0.9316  |
| H | -3.0131 | -0.0000 | -0.9316 |

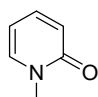

Gibbs free energy = -362.776320 Hartree

Cartesian coordinates:

|   |         |         |         |
|---|---------|---------|---------|
| C | 1.9817  | -0.4219 | 0.0002  |
| C | 1.7355  | 0.9765  | -0.0001 |
| C | 0.4358  | 1.4059  | -0.0002 |
| C | 0.9377  | -1.3106 | 0.0002  |
| H | 0.1701  | 2.4564  | 0.0002  |
| H | 2.5422  | 1.6986  | 0.0001  |
| H | 3.0044  | -0.7885 | -0.0004 |
| H | 1.0981  | -2.3828 | -0.0000 |
| C | -1.9953 | 1.0221  | 0.0001  |
| H | -2.5198 | 0.6574  | -0.8855 |
| H | -2.5197 | 0.6577  | 0.8858  |
| H | -1.9813 | 2.1113  | -0.0002 |
| C | -0.4351 | -0.8686 | -0.0000 |
| O | -1.4330 | -1.6164 | -0.0002 |
| N | -0.6130 | 0.5289  | 0.0001  |

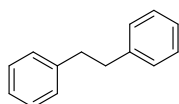

Gibbs free energy = -541.777920 Hartree

Cartesian coordinates:

|   |         |         |         |
|---|---------|---------|---------|
| C | -2.6211 | -1.2048 | -0.2145 |
|---|---------|---------|---------|

|   |         |         |         |
|---|---------|---------|---------|
| C | -2.6212 | 1.2049  | -0.2137 |
| C | -3.9886 | 1.2078  | 0.0789  |
| C | -4.6777 | -0.0002 | 0.2267  |
| C | -3.9884 | -1.2081 | 0.0781  |
| H | -2.0952 | -2.1494 | -0.3337 |
| H | -2.0955 | 2.1497  | -0.3322 |
| H | -4.5152 | 2.1521  | 0.1866  |
| H | -5.7405 | -0.0004 | 0.4510  |
| H | -4.5150 | -2.1525 | 0.1851  |
| C | -1.9161 | 0.0002  | -0.3639 |
| C | -0.4290 | 0.0003  | -0.6467 |
| H | -0.1651 | 0.8810  | -1.2437 |
| H | -0.1650 | -0.8800 | -1.2443 |
| C | 0.4290  | -0.0001 | 0.6467  |
| H | 0.1650  | -0.8807 | 1.2437  |
| H | 0.1650  | 0.8803  | 1.2442  |
| C | 1.9162  | -0.0000 | 0.3639  |
| C | 2.6213  | -1.2049 | 0.2144  |
| C | 2.6211  | 1.2048  | 0.2138  |
| C | 3.9885  | -1.2080 | -0.0782 |
| H | 2.0955  | -2.1495 | 0.3335  |
| C | 3.9884  | 1.2080  | -0.0789 |
| H | 2.0952  | 2.1495  | 0.3323  |
| C | 4.6777  | -0.0000 | -0.2267 |
| H | 4.5152  | -2.1523 | -0.1853 |
| H | 4.5149  | 2.1523  | -0.1864 |
| H | 5.7405  | -0.0000 | -0.4510 |

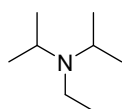

Gibbs free energy = -370.853088 Hartree

Cartesian coordinates:

|   |         |         |         |
|---|---------|---------|---------|
| N | 0.0014  | 0.2670  | 0.2004  |
| C | 0.2928  | 1.4717  | -0.5839 |
| C | -0.2830 | 2.7537  | 0.0298  |
| H | -0.0539 | 1.3819  | -1.6300 |
| H | 1.3791  | 1.5863  | -0.6372 |
| H | -0.0125 | 3.6193  | -0.5865 |
| H | -1.3755 | 2.7289  | 0.0971  |
| H | 0.1139  | 2.9085  | 1.0386  |
| C | -1.3924 | -0.2102 | 0.0748  |
| C | -1.8571 | -0.9305 | 1.3506  |
| C | -1.7047 | -1.0584 | -1.1776 |
| H | -1.9982 | 0.6993  | -0.0031 |
| H | -1.6996 | -0.2975 | 2.2293  |
| H | -2.9242 | -1.1706 | 1.2825  |
| H | -1.3213 | -1.8733 | 1.5093  |
| H | -1.3838 | -0.5557 | -2.0960 |
| H | -1.2185 | -2.0392 | -1.1342 |
| H | -2.7847 | -1.2295 | -1.2531 |
| C | 1.0606  | -0.7671 | 0.1939  |
| C | 2.1650  | -0.4061 | 1.2023  |
| C | 1.6829  | -1.0940 | -1.1831 |
| H | 0.5872  | -1.6853 | 0.5568  |
| H | 1.7447  | -0.2795 | 2.2046  |
| H | 2.9282  | -1.1921 | 1.2402  |
| H | 2.6671  | 0.5285  | 0.9250  |
| H | 0.9245  | -1.3454 | -1.9284 |
| H | 2.2745  | -0.2570 | -1.5701 |

H 2.3582 -1.9521 -1.0880

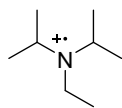

Gibbs free energy = -370.660633 Hartree

Cartesian coordinates:

N 0.0007 0.1249 -0.2321

C 0.5547 1.2367 -0.9969

C 0.3775 2.5926 -0.2821

H 0.0240 1.2562 -1.9566

H 1.6090 1.0415 -1.1869

H 0.7993 3.3634 -0.9318

H -0.6747 2.8289 -0.1103

H 0.9099 2.6075 0.6710

C -1.4646 0.0288 -0.0954

C -1.8877 0.1101 1.3839

C -1.9863 -1.2472 -0.7881

H -1.8652 0.8961 -0.6242

H -1.5301 1.0297 1.8525

H -2.9805 0.1106 1.4161

H -1.5335 -0.7471 1.9615

H -1.6872 -1.2819 -1.8384

H -1.6479 -2.1566 -0.2855

H -3.0782 -1.2218 -0.7432

C 0.8822 -0.8995 0.3522

C 1.8901 -0.2666 1.3309

C 1.5823 -1.7025 -0.7662

H 0.2315 -1.5747 0.9089

H 1.3849 0.3011 2.1153

H 2.4479 -1.0807 1.8009

|   |        |         |         |
|---|--------|---------|---------|
| H | 2.6078 | 0.3816  | 0.8218  |
| H | 0.8599 | -2.1465 | -1.4540 |
| H | 2.2843 | -1.0867 | -1.3335 |
| H | 2.1451 | -2.5092 | -0.2888 |



## 6. Scope and characterization of key compounds

The specific synthesis and structural characterization of pyridyl ethers **1a**, **1d**, **1e**, **1f**, **1g**, **1h**, **1i**, **1j**, **1m**, **1n**, **1p**, **1q**, **1r**, **1s** and pyridinium salt **2a** are described in detail in previous report.<sup>5</sup>

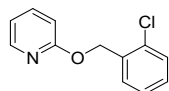

### 2-[(2-Chlorophenyl)methoxy]pyridine (**1b**)

The compound **1b** was obtained from 2-chloropyridine (0.95 mL, 10.0 mmol) and 2-chlorobenzyl alcohol (2.10 g, 15.0 mmol) as a colorless oil (2.00 g, 91%). <sup>1</sup>H NMR (400 MHz, CDCl<sub>3</sub>) δ 8.17 (ddd, *J* = 4.7, 2.4, 0.9 Hz, 1H), 7.61 – 7.50 (m, 2H), 7.41 – 7.35 (m, 1H), 7.28 – 7.19 (m, 2H), 6.87 (ddd, *J* = 6.6, 5.5, 1.0 Hz, 1H), 6.82 (dt, *J* = 8.3, 1.0 Hz, 1H), 5.49 (s, 2H). <sup>1</sup>H NMR spectrum is consistent with data reported in literature.<sup>3</sup>

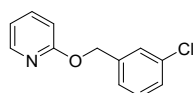

### 2-[(3-Chlorophenyl)methoxy]pyridine (**1c**)

The compound **1c** was obtained from 2-chloropyridine (0.95 mL, 10.0 mmol) and 3-chlorobenzyl alcohol (2.10 g, 15.0 mmol) as a pale yellow oil (2.15 g, 98 %). <sup>1</sup>H NMR (400 MHz, CDCl<sub>3</sub>) δ 8.15 (ddd, *J* = 4.6, 2.4, 0.9 Hz, 1H), 7.56 (ddd, *J* = 8.2, 7.3, 1.9 Hz, 1H), 7.45 (app d, *J* = 1.0 Hz, 1H), 7.32 – 7.28 (m, 1H), 7.28 – 7.22 (m, 2H), 6.89 – 6.83 (m, 1H), 6.80 (dt, *J* = 8.3, 1.0 Hz, 1H), 5.35 (s, 2H). <sup>1</sup>H NMR spectrum is consistent with data reported in literature.<sup>3</sup>

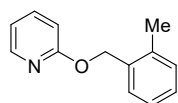

### 2-[(2-Methylphenyl)methoxy]pyridine (**1k**)

The compound **1k** was obtained from 2-chloropyridine (0.76 mL, 8.0 mmol) and 2-methylbenzyl alcohol (1.47 g, 12.0 mmol) as a pale yellow oil (1.35 g, 85 %). <sup>1</sup>H NMR (400 MHz, CDCl<sub>3</sub>) δ 8.18 (ddd, *J* = 4.6, 2.4, 0.8 Hz, 1H), 7.58 – 7.49 (m, 1H), 7.46 – 7.40 (m, 1H), 7.25 – 7.15 (m, 3H), 6.85 (ddd, *J* = 6.7, 5.6, 1.0 Hz, 1H), 6.78 (d, *J* = 8.4 Hz, 1H), 5.36 (s, 2H), 2.38 (s, 3H). <sup>1</sup>H NMR spectrum is consistent with data reported in literature.<sup>3</sup>

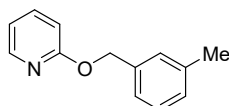

### 2-[(3-Methylphenyl)methoxy]pyridine (**11**)

The compound **11** was obtained from 2-chloropyridine (0.76 mL, 8.0 mmol) and 3-methylbenzyl alcohol (1.47 g, 12.0 mmol) as a pale yellow oil (1.28 g, 80 %). <sup>1</sup>H NMR (400 MHz, CDCl<sub>3</sub>) δ 8.16 (ddd, *J* = 4.7, 2.4, 0.8 Hz, 1H), 7.53 (ddd, *J* = 8.0, 7.2, 2.0 Hz, 1H), 7.30 – 7.20 (m, 3H), 7.14 – 7.07 (m, 1H), 6.83 (ddd, *J* = 6.6, 5.5, 1.0 Hz, 1H), 6.78 (dt, *J* = 8.4, 1.0 Hz, 1H), 5.34 (s, 2H), 2.34 (s, 3H). <sup>1</sup>H NMR spectrum is consistent with data reported in literature.<sup>3</sup>

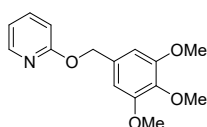

### 2-[(3,4,5-Trimethoxybenzyl)oxy]pyridine (**10**)

The compound **10** was obtained from 2-chloropyridine (0.95 mL, 10.0 mmol) and 3,4,5-trimethoxybenzyl alcohol (1.93 ml, 12.0 mmol) as a colorless oil (2.00 g, 73 %). <sup>1</sup>H NMR (400 MHz, CDCl<sub>3</sub>) δ 8.22 – 8.13 (m, 1H), 7.62 – 7.52 (m, 1H), 6.92 – 6.85 (m, 1H), 6.81 (app d, *J* = 8.4 Hz, 1H), 6.70 (s, 2H), 5.31 (s, 2H), 3.86 (s, 6H), 3.85 (s, 3H). <sup>13</sup>C NMR (100 MHz, CDCl<sub>3</sub>) δ 163.5, 153.3, 146.8, 138.6, 137.6, 132.9, 117.0, 111.2, 105.2, 67.7, 60.7, 56.0. IR 2937, 2838, 1592, 1569, 1506, 1461, 1431, 1419, 1366, 1330, 1310, 1272, 1233, 1123, 1042, 1003 cm<sup>-1</sup>. HRMS (ESI) [M+H]<sup>+</sup> calcd for C<sub>15</sub>H<sub>18</sub>NO<sub>4</sub><sup>+</sup>: 276.1230, found: 276.1225.

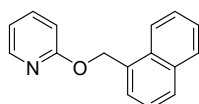

### 2-[(1-Naphthalenyl)methoxy]pyridine (**1t**)

The compound **1t** was obtained from 2-chloropyridine (0.76 mL, 8.0 mmol) and 1-naphthalenemethanol (1.39 g, 8.8 mmol) as a colorless oil (1.36 g, 72%). <sup>1</sup>H NMR (400 MHz, CDCl<sub>3</sub>) δ 8.21 (ddd, *J* = 4.7, 2.4, 0.9 Hz, 1H), 8.13 – 8.05 (m, 1H), 7.89 – 7.76 (m, 2H), 7.62 (d, *J* = 7.0 Hz, 1H), 7.57 – 7.38 (m, 4H), 6.85 (ddd, *J* = 6.6, 5.5, 1.0 Hz, 1H), 6.78 (dt, *J* = 8.4, 1.0 Hz, 1H), 5.82 (s, 2H). <sup>1</sup>H NMR spectrum is consistent with data reported in literature.<sup>4</sup>

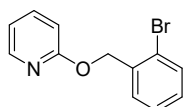

### 2-[(2-Bromophenyl)methoxy]pyridine (**1u**)

The compound **1u** was obtained from 2-chloropyridine (0.95 mL, 10.0 mmol) and 2-bromobenzyl alcohol (2.83 g, 15.0 mmol) as a pale yellow solid (2.31 g, 88 %). <sup>1</sup>H NMR (400 MHz, CDCl<sub>3</sub>) δ 8.18 (ddd, *J* = 4.6, 2.5, 0.8 Hz, 1H), 7.62 – 7.55 (m, 2H), 7.55 – 7.50 (m, 1H), 7.30 (td, *J* = 7.4, 1.2 Hz, 1H), 7.16 (td, *J* = 7.8, 1.8 Hz, 1H), 6.88 (ddd, *J* = 6.6, 5.5, 1.0 Hz, 1H), 6.84 (dt, *J* = 8.4, 1.0 Hz, 1H), 5.46 (s, 2H). <sup>1</sup>H NMR spectrum is consistent with data reported in literature.<sup>6</sup>

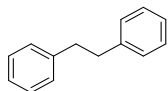

### Dibenzyl (**3a**)

The compound **3a** was obtained from **1a** (37 mg, 0.2 mmol) as a white solid (15 mg, 85%). <sup>1</sup>H NMR (400 MHz, CDCl<sub>3</sub>) δ 7.27 (app t, *J* = 7.7 Hz, 4H), 7.18 (t, *J* = 7.0 Hz, 6H), 2.91 (s, 4H). <sup>1</sup>H NMR spectrum is consistent with data reported in literature.<sup>7</sup>

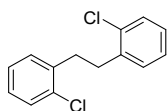

### 2,2'-Dichlorobibenzyl (**3b**)

The compound **3b** was obtained from **1b** (88 mg, 0.4 mmol) as a white solid (41 mg, 80%). <sup>1</sup>H NMR (400 MHz, CDCl<sub>3</sub>) δ 7.38 – 7.30 (m, 2H), 7.18 – 7.09 (m, 6H), 3.03 (s, 4H). <sup>1</sup>H NMR spectrum is consistent with data reported in literature.<sup>7</sup>

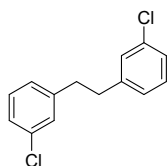

### 1,2-Bis(3-chlorophenyl)ethane (**3c**)

The compound **3c** was obtained from **1c** (88 mg, 0.4 mmol) as a white solid (29 mg, 58%). <sup>1</sup>H NMR (400 MHz, CDCl<sub>3</sub>) δ 7.23 – 7.12 (m, 6H), 7.01 (dt, *J* = 6.2, 2.3 Hz, 2H), 2.87 (s, 4H).

<sup>1</sup>H NMR spectrum is consistent with data reported in literature.<sup>8</sup>

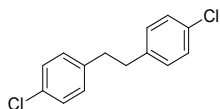

### 1,2-Bis(4-chlorophenyl)ethane (**3d**)

The compound **3d** was obtained from **1d** (88 mg, 0.4 mmol) as a white solid (41 mg, 81%). <sup>1</sup>H NMR

(400 MHz, CDCl<sub>3</sub>)  $\delta$  7.26 – 7.17 (m, 4H), 7.07 – 7.00 (m, 4H), 2.85 (s, 4H). <sup>1</sup>H NMR spectrum is consistent with data reported in literature.<sup>7</sup>

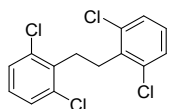

### 1,1'-(1,2-Ethanediyl)bis[2,6-dichlorobenzene] (3e)

The compound **3e** was obtained from **1e** (102 mg, 0.4 mmol) as a white solid (42 mg, 65%). <sup>1</sup>H NMR (400 MHz, CDCl<sub>3</sub>)  $\delta$  7.25 (d,  $J$  = 8.1 Hz, 4H), 7.06 (t,  $J$  = 8.2 Hz, 2H), 3.24 (s, 4H). <sup>1</sup>H NMR spectrum is consistent with data reported in literature.<sup>9</sup>

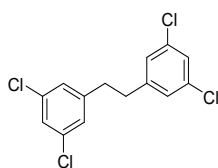

### 1,1'-(1,2-Ethanediyl)bis[3,5-dichlorobenzene] (3f)

The compound **3f** was obtained from **1f** (102 mg, 0.4 mmol) as a white solid (43 mg, 66%). <sup>1</sup>H NMR (400 MHz, CDCl<sub>3</sub>)  $\delta$  7.22 (t,  $J$  = 2.0 Hz, 2H), 7.04 (d,  $J$  = 1.9 Hz, 4H), 2.84 (s, 4H). <sup>1</sup>H NMR spectrum is consistent with data reported in literature.<sup>10</sup>

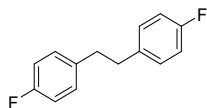

### 1,2-Bis(4-fluorophenyl)ethane (3g)

The compound **3g** was obtained from **1g** (81 mg, 0.4 mmol) as a white solid (42 mg, 90%). <sup>1</sup>H NMR (400 MHz, CDCl<sub>3</sub>)  $\delta$  7.11 – 7.02 (m, 4H), 6.98 – 6.89 (m, 4H), 2.86 (s, 4H). <sup>1</sup>H NMR spectrum is consistent with data reported in literature.<sup>8</sup>

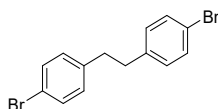

### 1,2-Bis(4-bromophenyl)ethane (3h)

The compound **3h** was obtained from **1h** (106 mg, 0.4 mmol) as a white solid (49 mg, 72%). <sup>1</sup>H NMR (400 MHz, CDCl<sub>3</sub>)  $\delta$  7.40 – 7.34 (m, 4H), 7.01 – 6.95 (m, 4H), 2.83 (s, 4H). <sup>1</sup>H NMR spectrum is consistent with data reported in literature.<sup>8</sup>

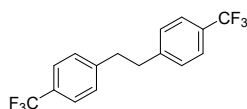

### 1,1'-(1,2-Ethanediy)bis[4-(trifluoromethyl)benzene] (3i)

The compound **3i** was obtained from **1i** (38 mg, 0.15 mmol) as a white soild (15 mg, 61%). <sup>1</sup>H NMR (400 MHz, CDCl<sub>3</sub>) δ 7.53 (d, *J* = 8.0 Hz, 4H), 7.28 – 7.22 (m, 4H), 2.99 (s, 4H). <sup>1</sup>H NMR spectrum is consistent with data reported in literature.<sup>7</sup>

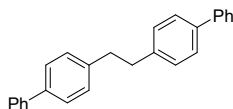

### 4-(2-[1,1'-Biphenyl]-4-ylethyl)-1,1'-biphenyl (3j)

The compound **3j** was obtained from **1j** (105 mg, 0.4 mmol) as a white soild (65 mg, 54%). <sup>1</sup>H NMR (400 MHz, CDCl<sub>3</sub>) δ 7.59 (d, *J* = 8.0 Hz, 4H), 7.53 (d, *J* = 7.8 Hz, 4H), 7.43 (t, *J* = 7.6 Hz, 4H), 7.36 – 7.26 (m, 6H), 3.00 (s, 4H). <sup>1</sup>H NMR spectrum is consistent with data reported in literature.<sup>7</sup>

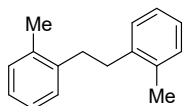

### 1,2-Bis(2-methylphenyl)ethane (3k)

The compound **3k** was obtained from **1k** (80 mg, 0.4 mmol) as a white soild (62 mg, 74%). <sup>1</sup>H NMR (400 MHz, CDCl<sub>3</sub>) δ 7.18 – 7.08 (m, 8H), 2.85 (s, 4H), 2.31 (s, 6H). <sup>1</sup>H NMR spectrum is consistent with data reported in literature.<sup>7</sup>

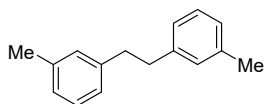

### 1,2-Bis(3-methylphenyl)ethane (3l)

The compound **3l** was obtained from **1l** (80 mg, 0.4 mmol) as a white soild (63 mg, 75%). <sup>1</sup>H NMR (400 MHz, CDCl<sub>3</sub>) δ 7.17 (t, *J* = 7.6 Hz, 2H), 7.06 – 6.94 (m, 6H), 2.86 (s, 4H), 2.33 (s, 6H). <sup>1</sup>H NMR spectrum is consistent with data reported in literature.<sup>7</sup>

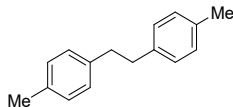

### 1,2-Bis(4-methylphenyl)ethane (3m)

The compound **3m** was obtained from **1m** (80 mg, 0.4 mmol) as a white soild (20 mg, 47%). <sup>1</sup>H NMR (400 MHz, CDCl<sub>3</sub>) δ 7.08 (s, 8H), 2.85 (s, 4H), 2.32 (s, 6H). <sup>1</sup>H NMR spectrum is consistent with data reported in literature.<sup>8</sup>

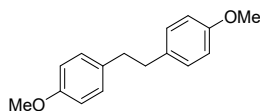

### 1,2-Bis(4-methoxyphenyl)ethane (3n)

The compound **3n** was obtained from **1n** (86 mg, 0.4 mmol) as a white solid (17 mg, 34%). <sup>1</sup>H NMR (400 MHz, CDCl<sub>3</sub>) δ 7.11 – 7.05 (m, 4H), 6.85 – 6.79 (m, 4H), 3.79 (s, 6H), 2.83 (s, 4H). <sup>1</sup>H NMR spectrum is consistent with data reported in literature.<sup>7</sup>

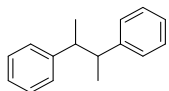

### 2,3-Diphenylbutane (3p)

The compound **3p** was obtained from **1p** (80 mg, 0.4 mmol) as a white solid (35 mg, 82%). The isolated as a mixture of dl and meso compounds (about 1:1). <sup>1</sup>H NMR (400 MHz, CDCl<sub>3</sub>) δ 7.36 – 7.26 (m, 2H), 7.26 – 7.13 (m, 5H), 7.12 – 6.96 (m, 3H), 3.00 – 2.88 (m, 1H), 2.86 – 2.73 (m, 1H), 1.30 – 1.24 (m, 3H), 1.08 – 0.96 (m, 3H). <sup>1</sup>H NMR spectrum is consistent with data reported in literature.<sup>11</sup>

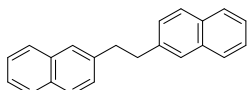

### 2,2'-(1,2-Ethanediy)bis[naphthalene] (3s)

The compound **3s** was obtained from **1s** (94 mg, 0.4 mmol) as a white solid (57 mg, 51%). <sup>1</sup>H NMR (400 MHz, CDCl<sub>3</sub>) δ 7.84 – 7.73 (m, 6H), 7.65 (app s, 2H), 7.48 – 7.39 (m, 4H), 7.36 (dd, *J* = 8.4, 1.8 Hz, 2H), 3.18 (s, 4H). <sup>1</sup>H NMR spectrum is consistent with data reported in literature.<sup>7</sup>

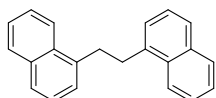

### 1,1'-(1,2-Ethanediy)bis[naphthalene] (3t)

The compound **3t** was obtained from **1t** (94 mg, 0.4 mmol) as a white solid (44 mg, 39%). <sup>1</sup>H NMR (400 MHz, CDCl<sub>3</sub>) δ 8.12 (d, *J* = 8.2 Hz, 2H), 7.92 – 7.82 (m, 2H), 7.74 (d, *J* = 8.1 Hz, 2H), 7.56 – 7.45 (m, 4H), 7.39 (t, *J* = 7.0 Hz, 2H), 7.36 – 7.30 (m, 2H), 3.51 (s, 4H). <sup>1</sup>H NMR spectrum is consistent with data reported in literature.<sup>12</sup>

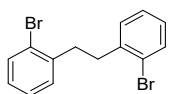

### 1,2-Bis(2-bromophenyl)ethane (3u)

The compound **3u** was obtained from **1u** (117 mg, 0.4 mmol) as a white solid (49 mg, 71%). <sup>1</sup>H NMR (400 MHz, CDCl<sub>3</sub>) δ 7.54 (dd, *J* = 8.0, 1.3 Hz, 2H), 7.25 – 7.14 (m, 4H), 7.06 (ddd, *J* = 7.9, 6.8, 2.4 Hz, 2H), 3.03 (s, 4H). <sup>1</sup>H NMR spectrum is consistent with data reported in literature.<sup>8</sup>

## References:

1. K. W. C. Poon, P. A. Albiniaak and G. B. Dudley, *Org. Synth.*, 2007, **84**, 295-305.
2. A. Huo, X. Wang, X. Li, Y. Zhang, Y. Guo, L. Zhang, F. Wang, J. Wang, F. Li, Q. He, H. Liang, T. Jin, Z. Wang and J. Yang, *Synth. Commun.*, 2020, **50**, 3669-3675.
3. E. L. Lanni, M. A. Bosscher, B. D. Ooms, C. A. Shandro, B. A. Ellsworth and C. E. Anderson, *J. Org. Chem.*, 2008, **73**, 6425-6428.
4. M. Tobisu, J. Zhao, H. Kinuta, T. Furukawa, T. Igarashi and N. Chatani, *Adv. Synth. Catal.*, 2016, **358**, 2417-2421.
5. F. Wang, Y. Tang, X. Li, J. Chen and J. Yang, *Org. Lett.*, 2022, **24**, 7309-7314.
6. C. S. Yeung, T. H. H. Hsieh and V. M. Dong, *Chem. Sci.*, 2011, **2**, 544-551.
7. D. Cao, C.-C. Li, H. Zeng, Y. Peng and C.-J. Li, *Nat. Commun.*, 2021, **12**, 3729.
8. B. J. Fallon, V. Corce, M. Amatore, C. Aubert, F. Chemla, F. Ferreira, A. Perez-Luna and M. Petit, *New J. Chem.*, 2016, **40**, 9912-9916.
9. Z. Guo, T. Pang, X. Wei, China, CN110734354, 2020.
10. Y. Li, P. Ren, D. Zhang, W. Qiao, D. Wang, X. Yang, X. Wen, M. H. Rummeli, H. Niemantsverdriet, J. P. Lewis, F. Besenbacher, H. Xiang, Y. Li and R. Su, *ACS Catal.*, 2021, **11**, 4338-4348.
11. J. Wu, J. Gu, Q. Chen, H. Ma and Y. Li, *Chin. J. Org. Chem.*, 2020, **40**, 2772-2777.
12. Z.-C. Cao and Z.-J. Shi, *J. Am. Chem. Soc.*, 2017, **139**, 6546-6549.



# NMR SPECTR

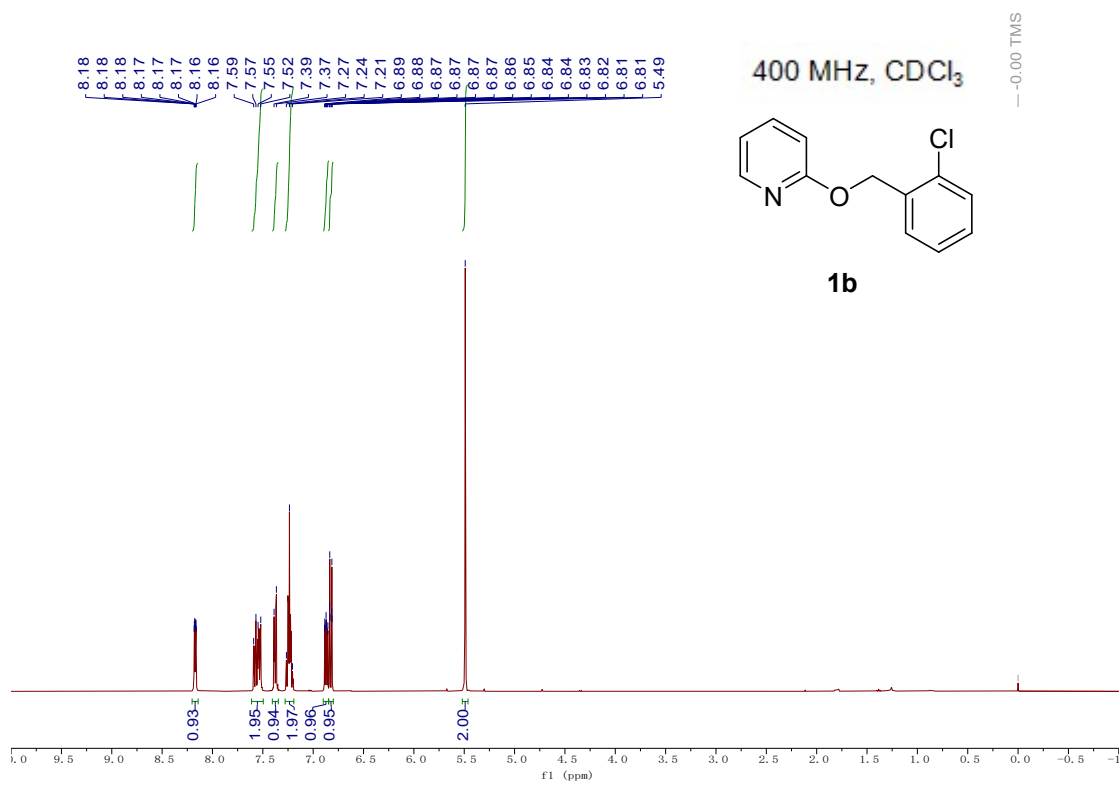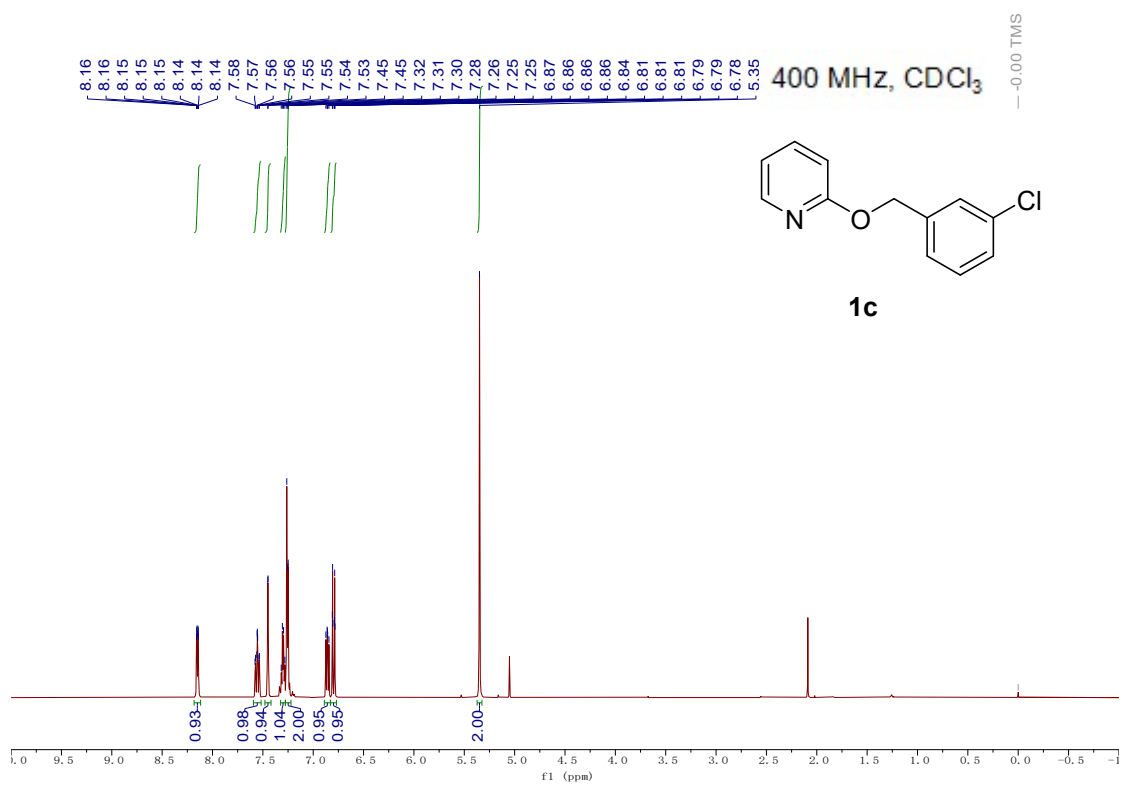

1SM. 1. fid

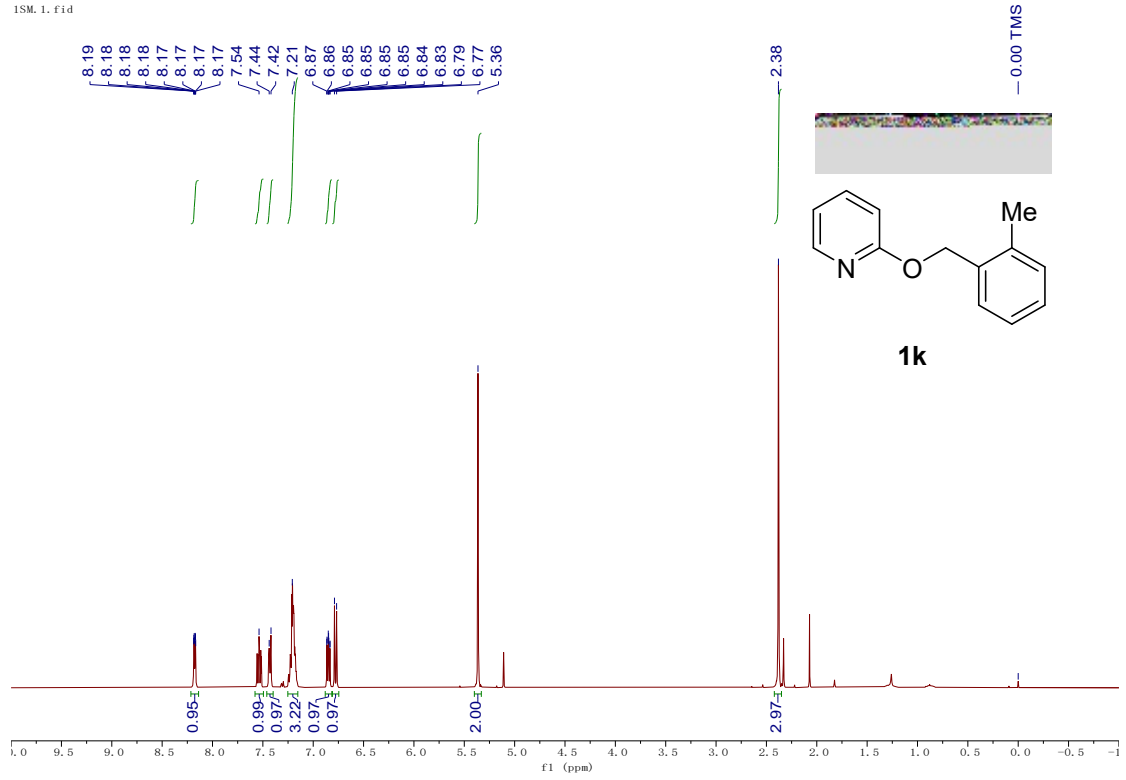

2SM. 1. fid

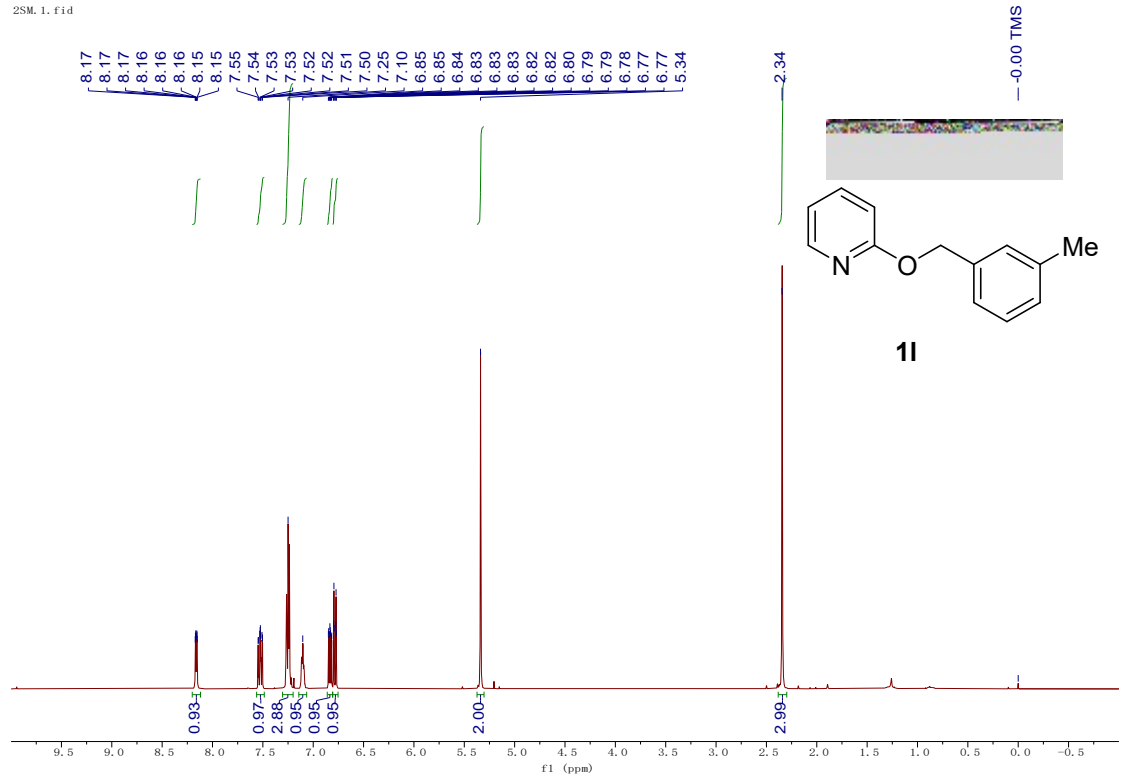

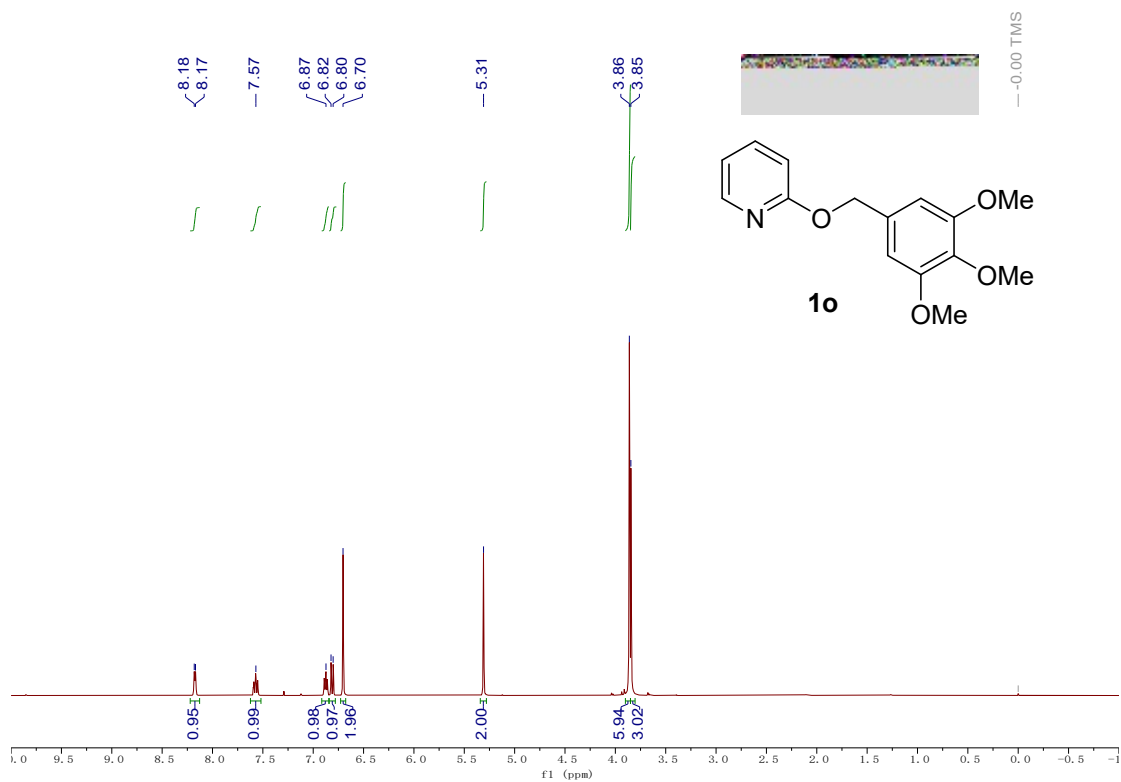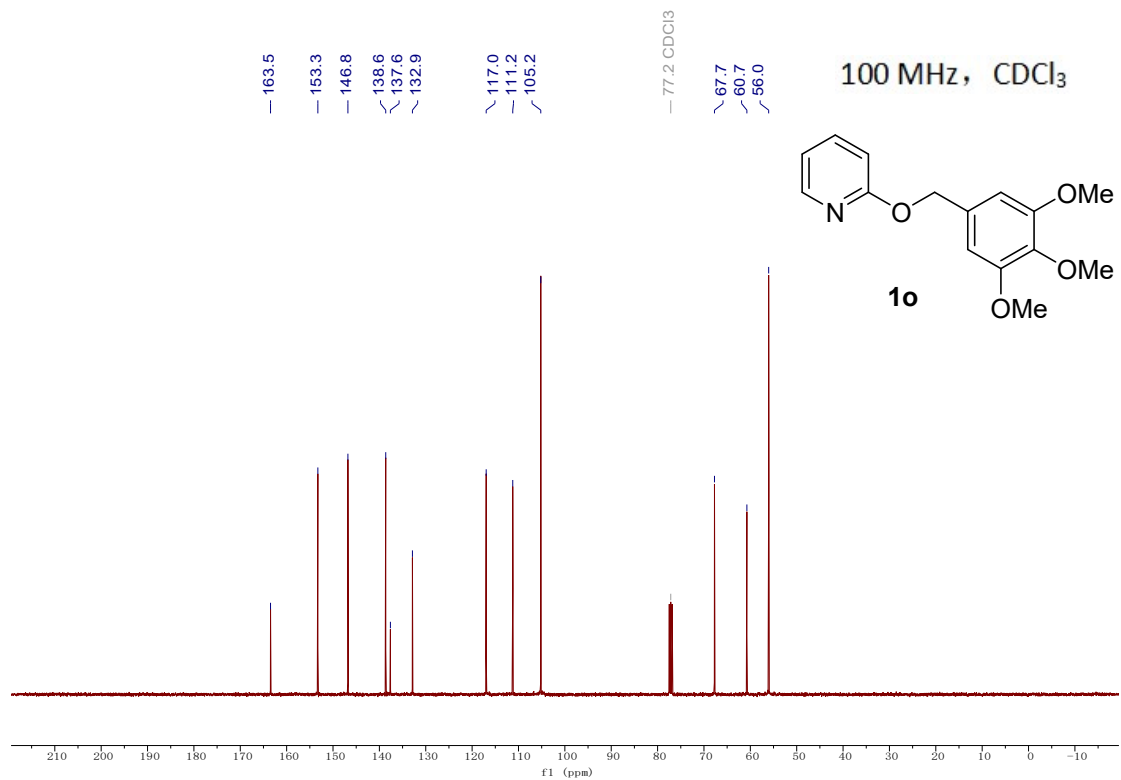

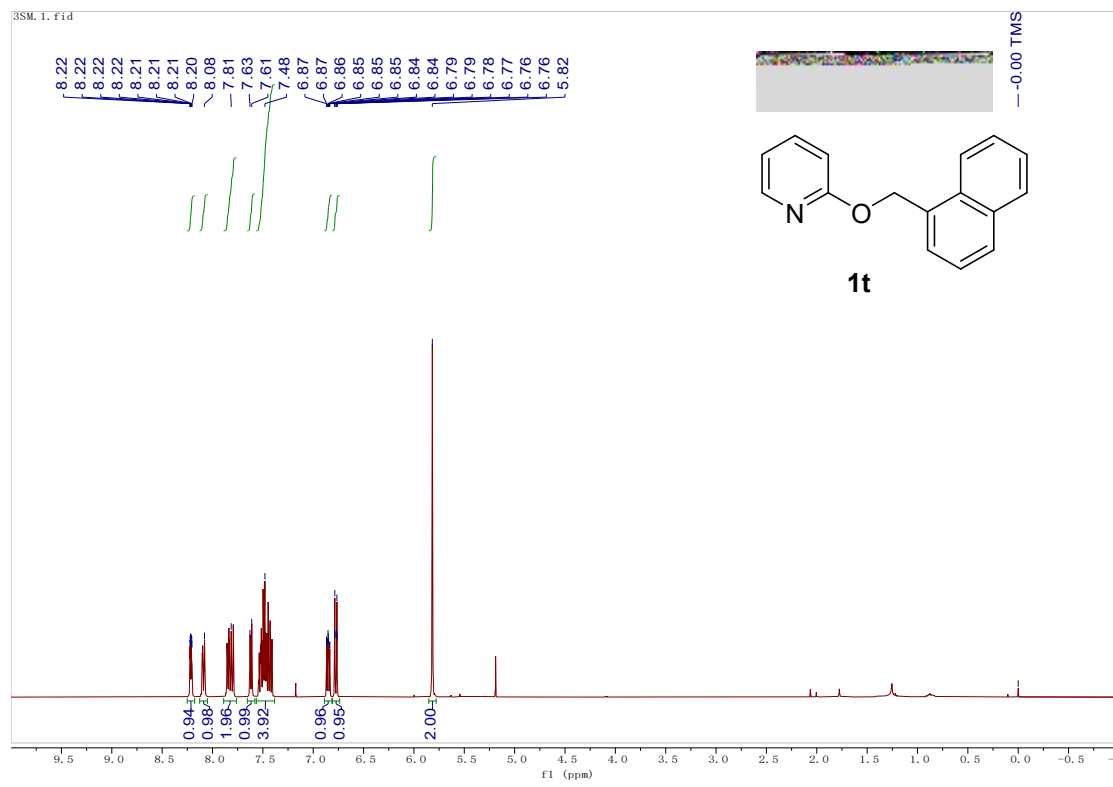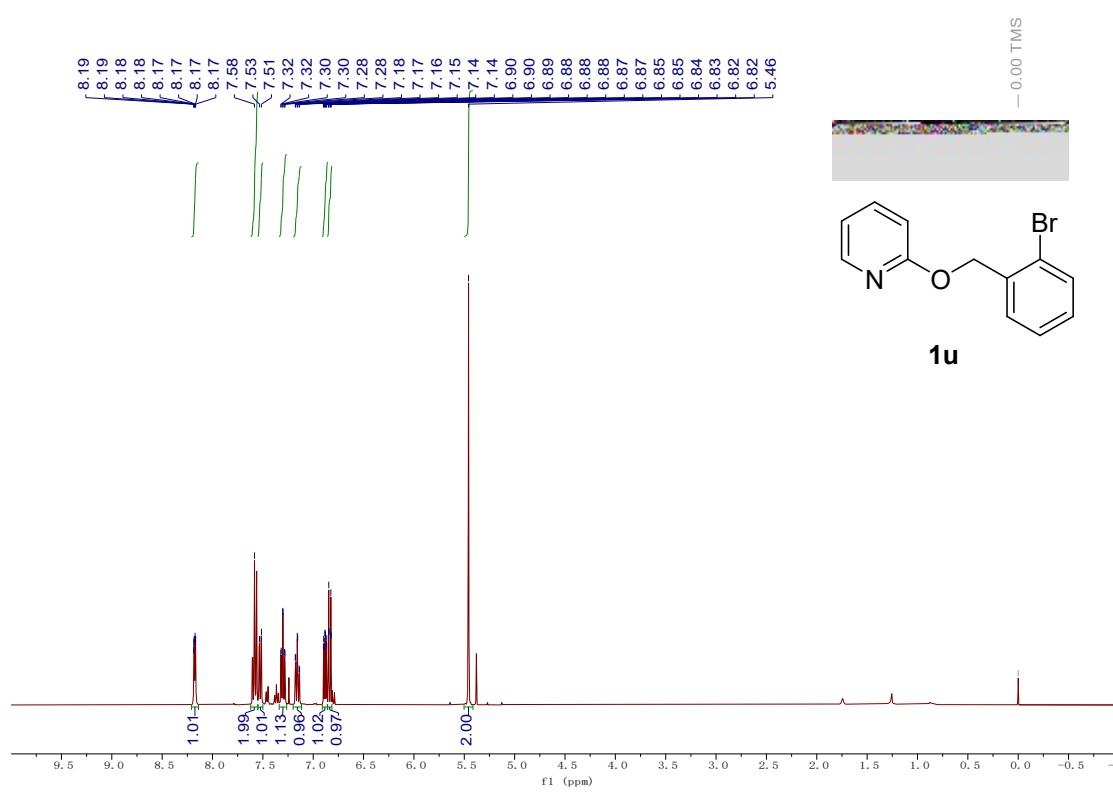

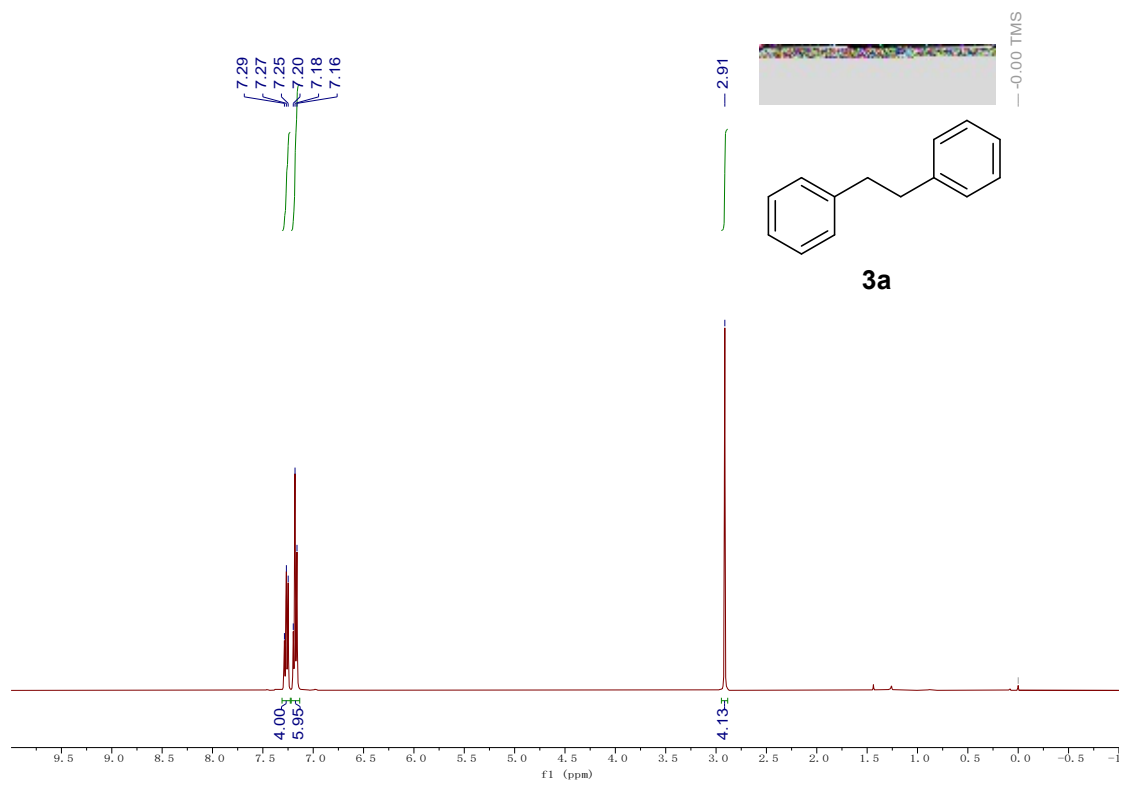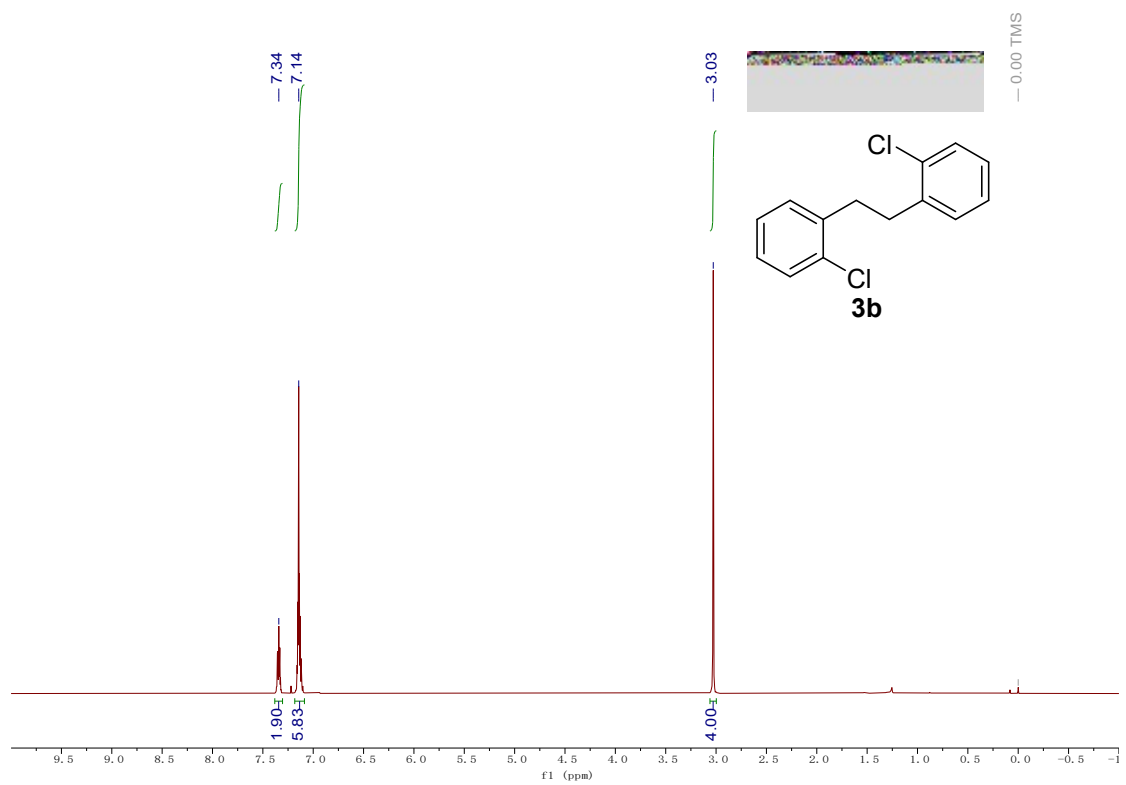

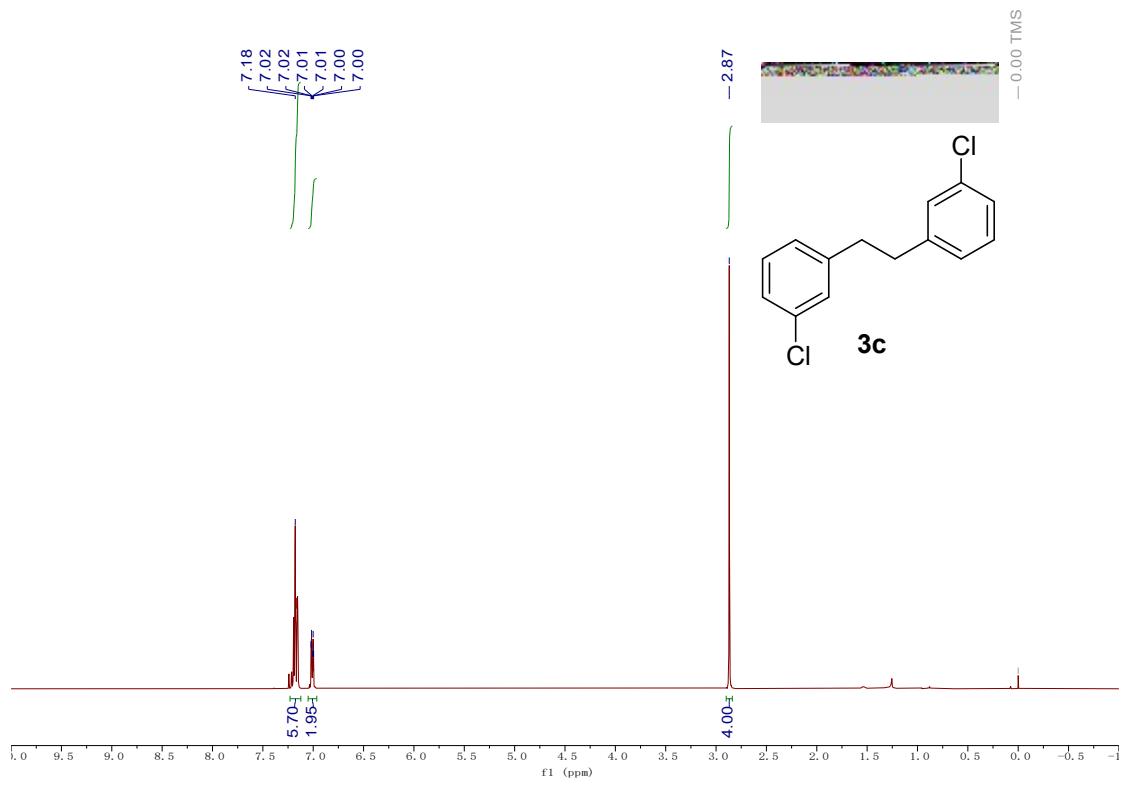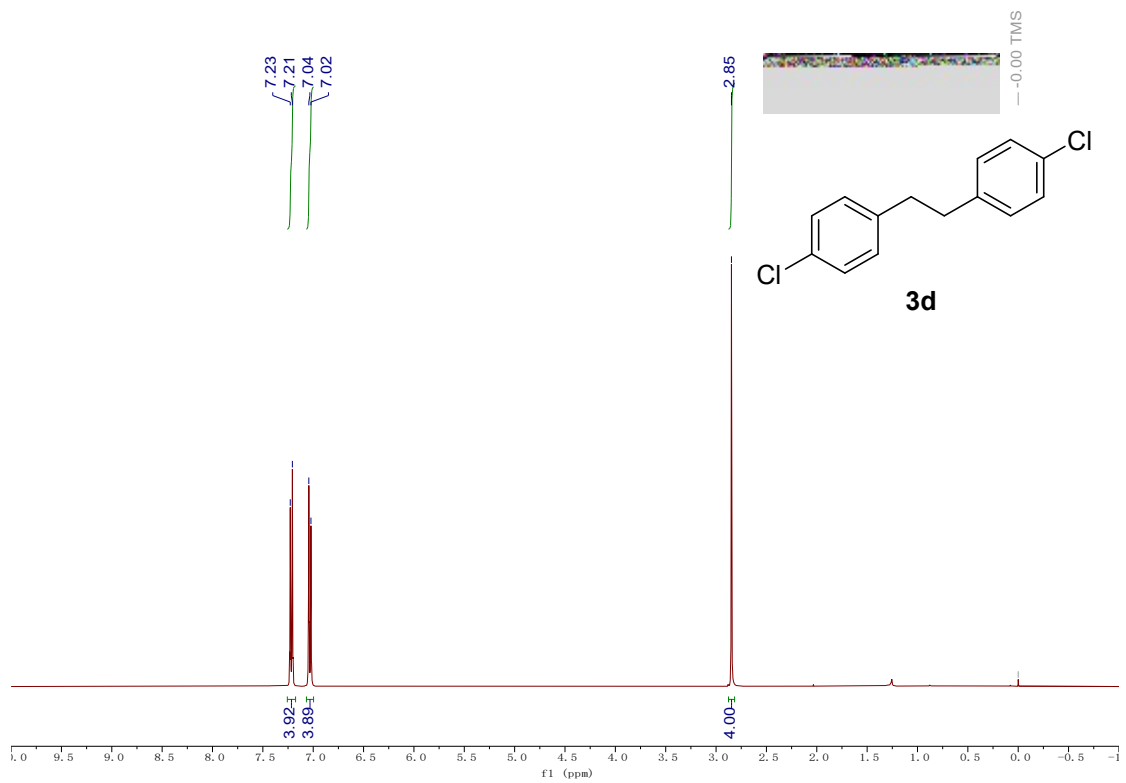

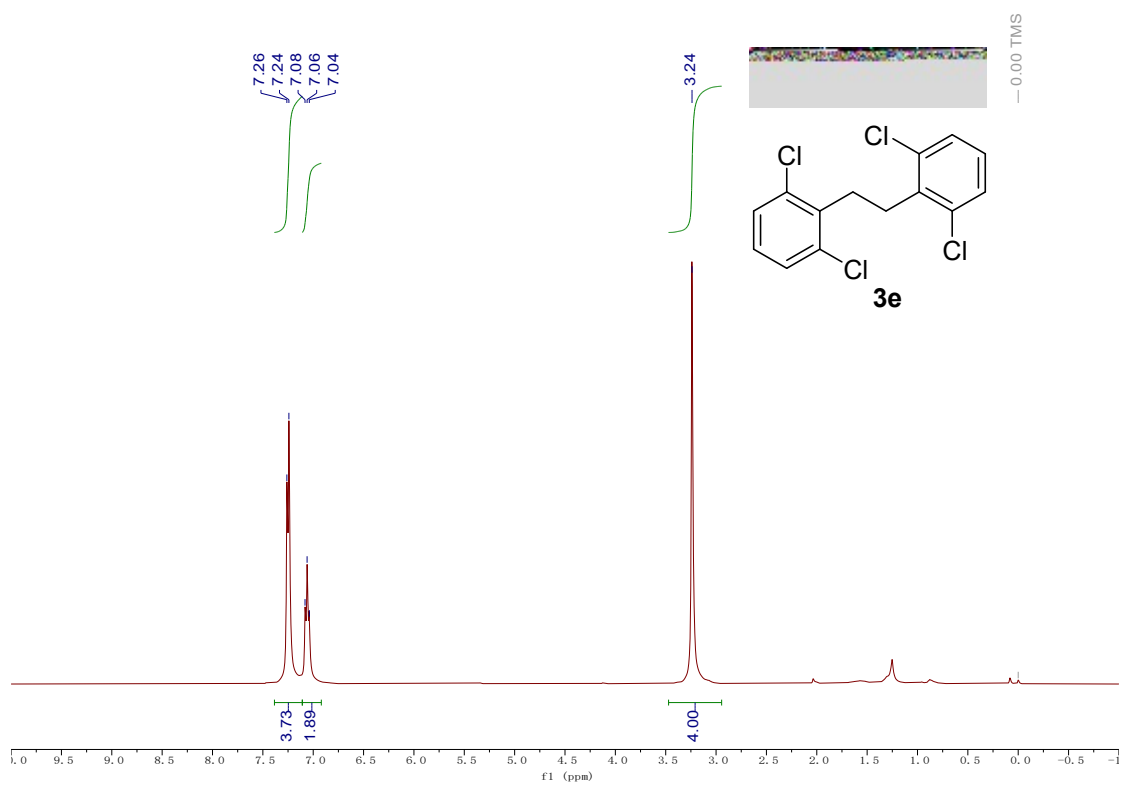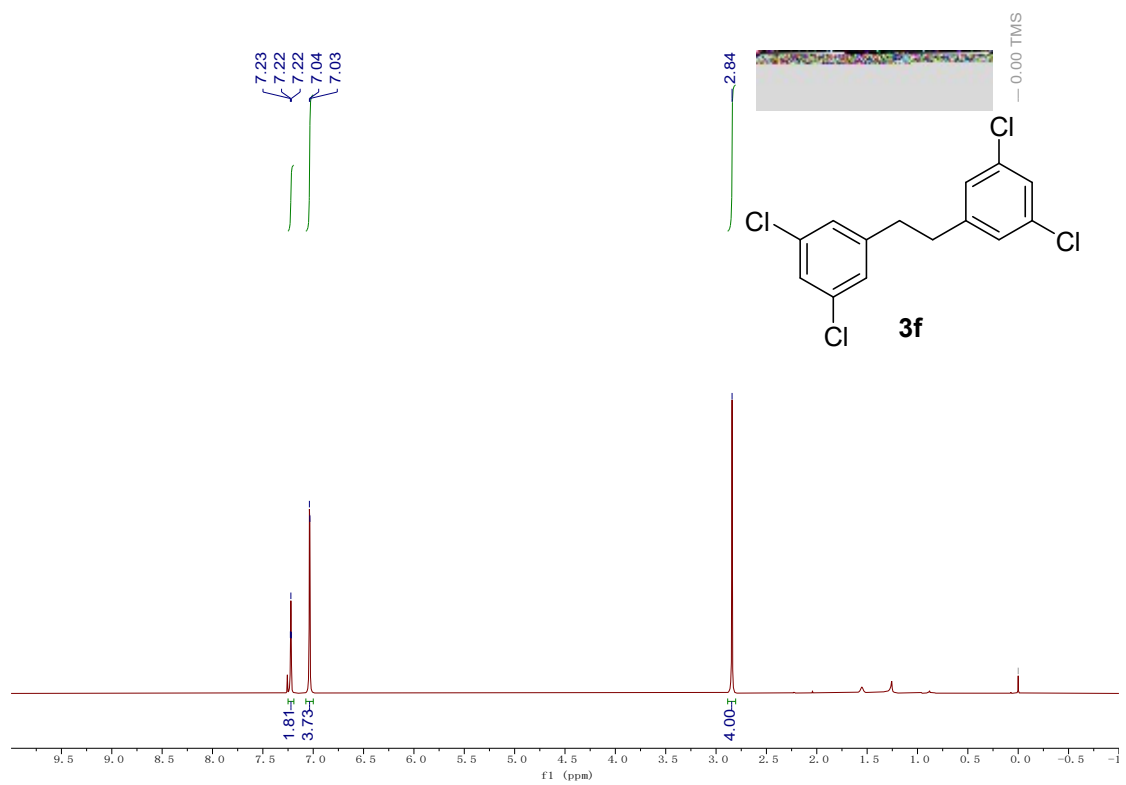

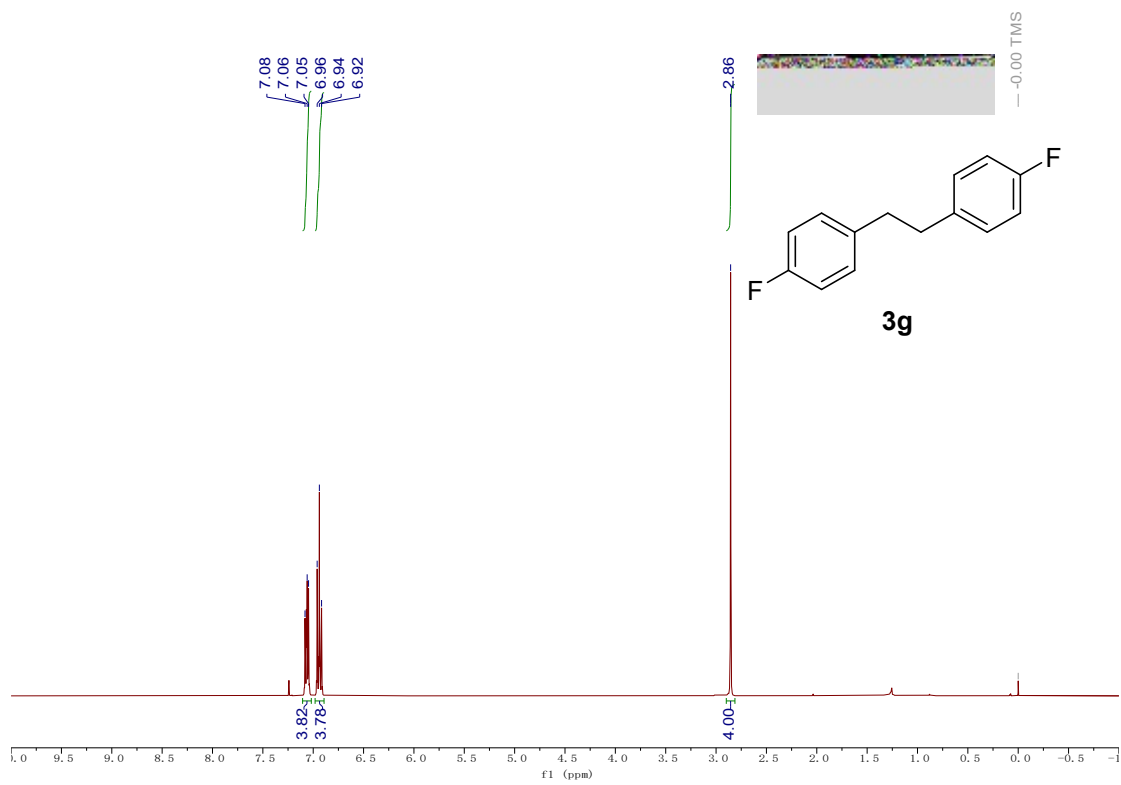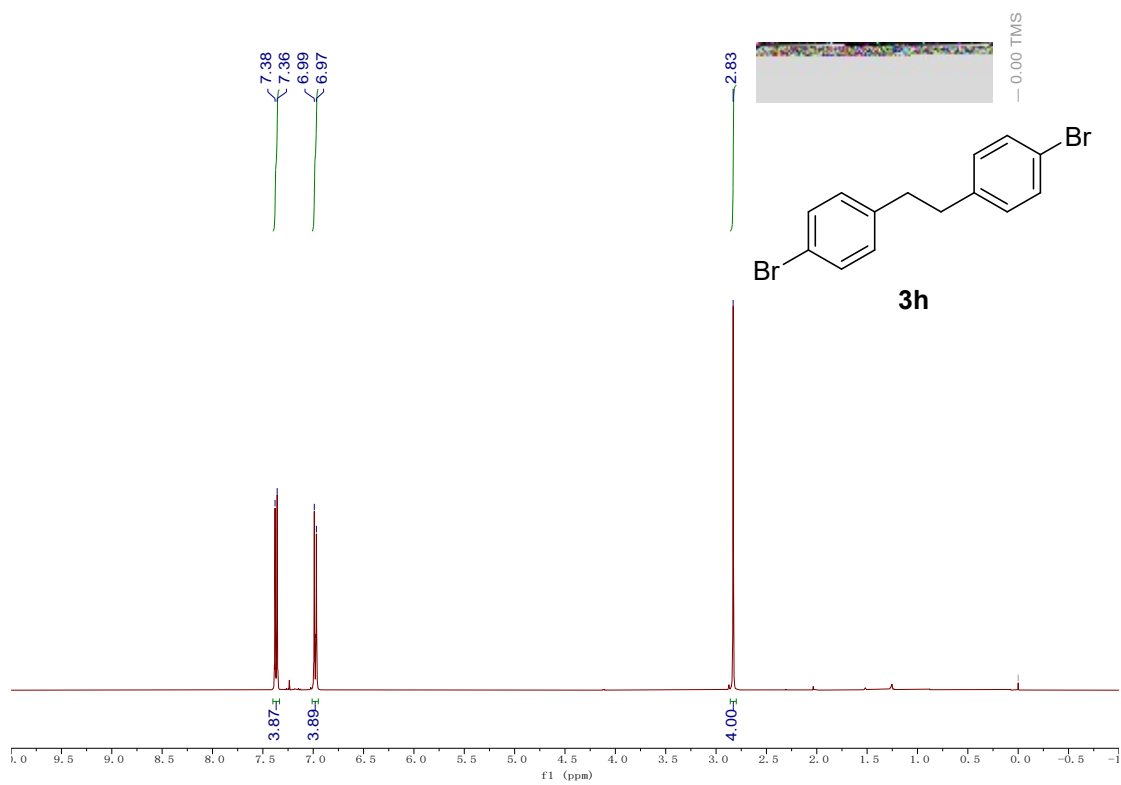



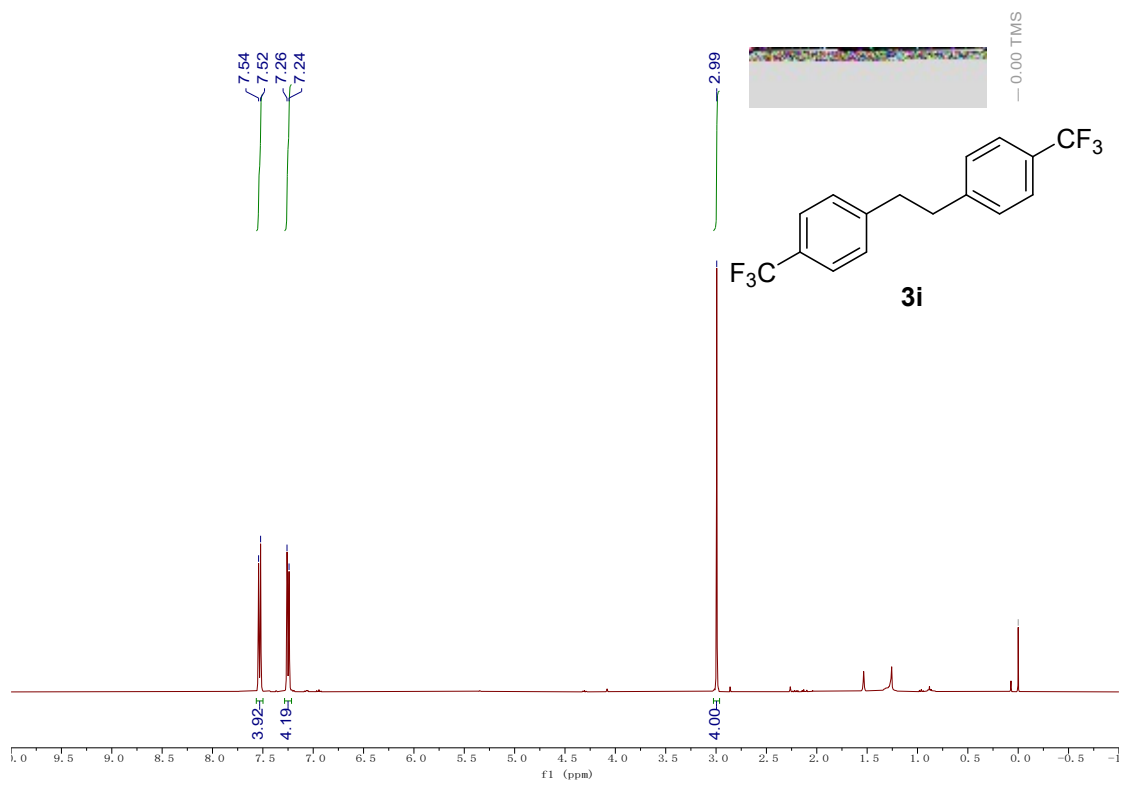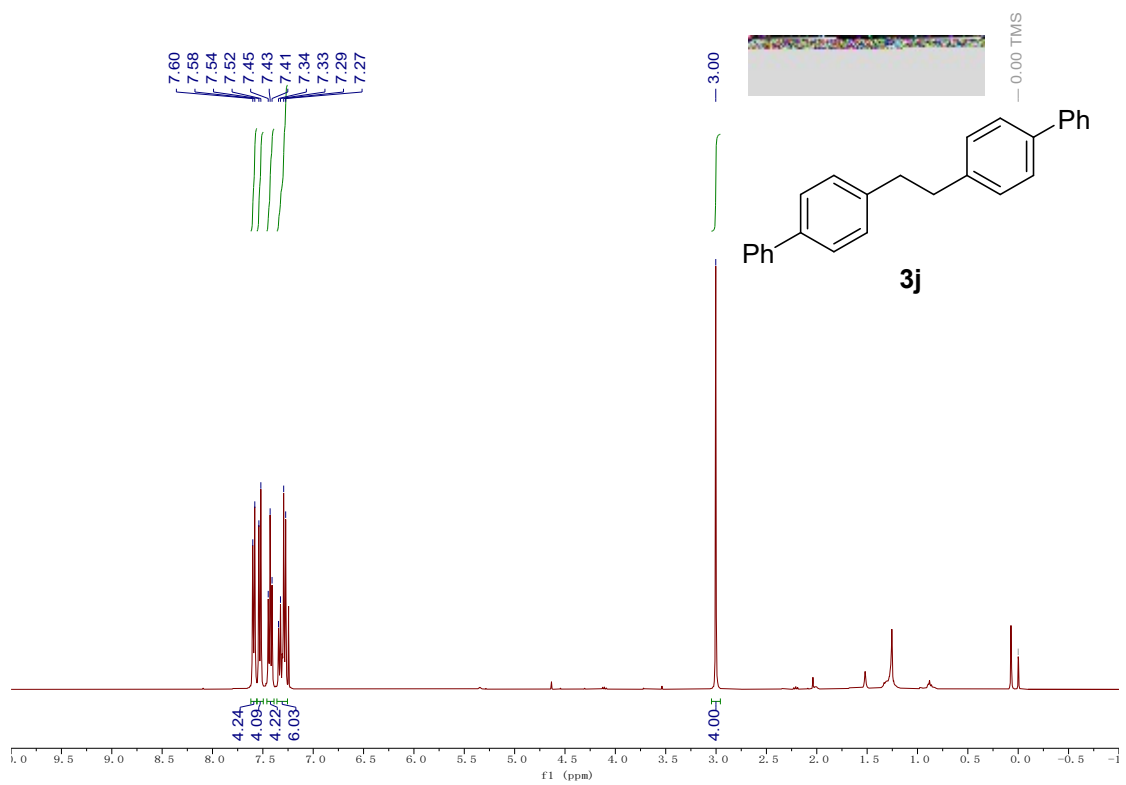

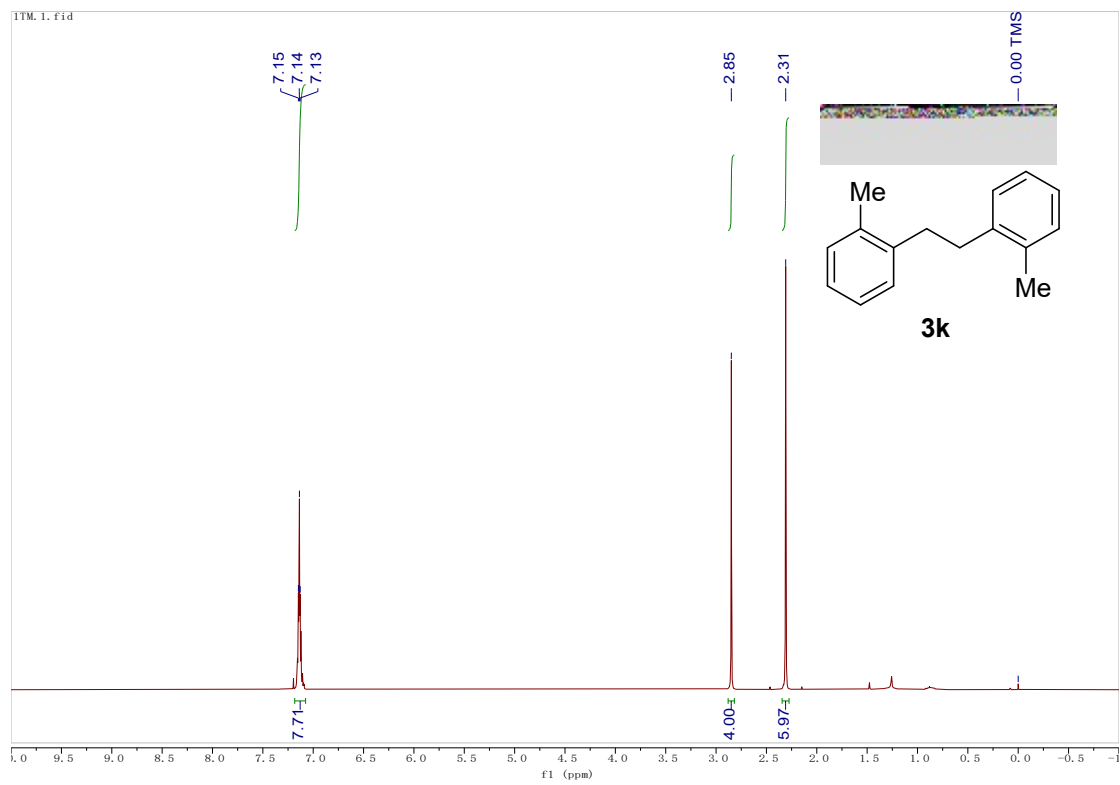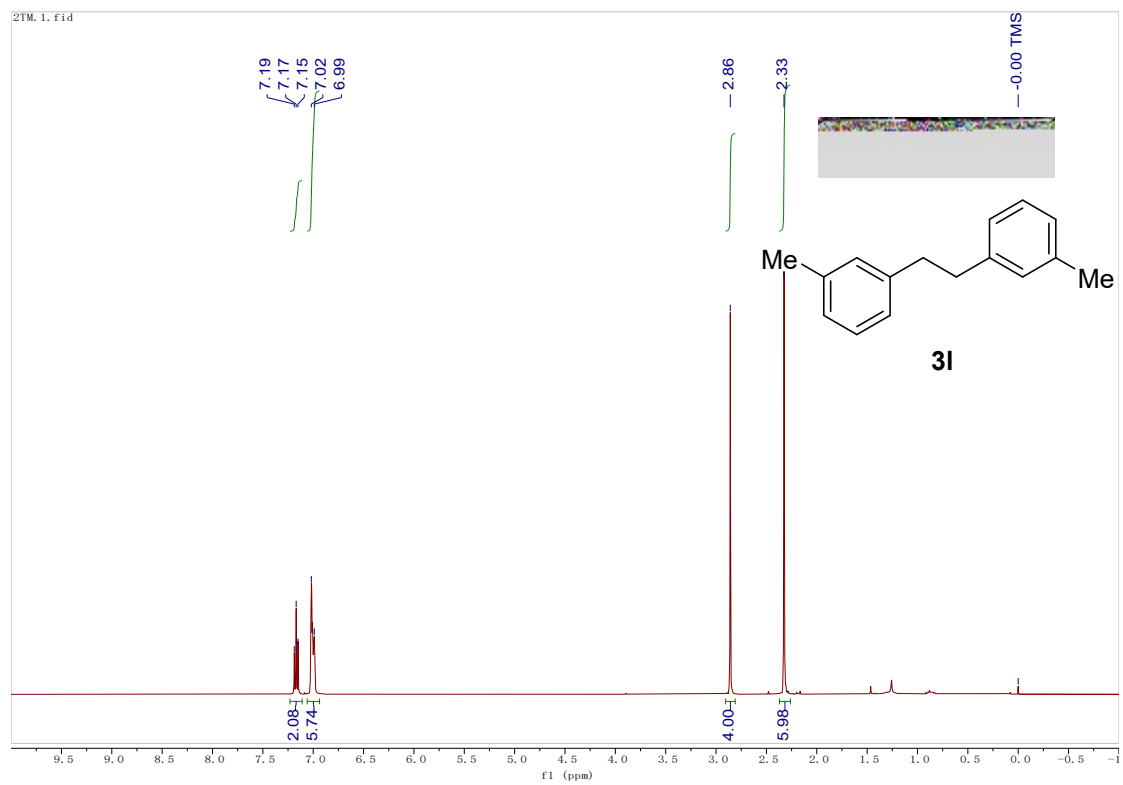

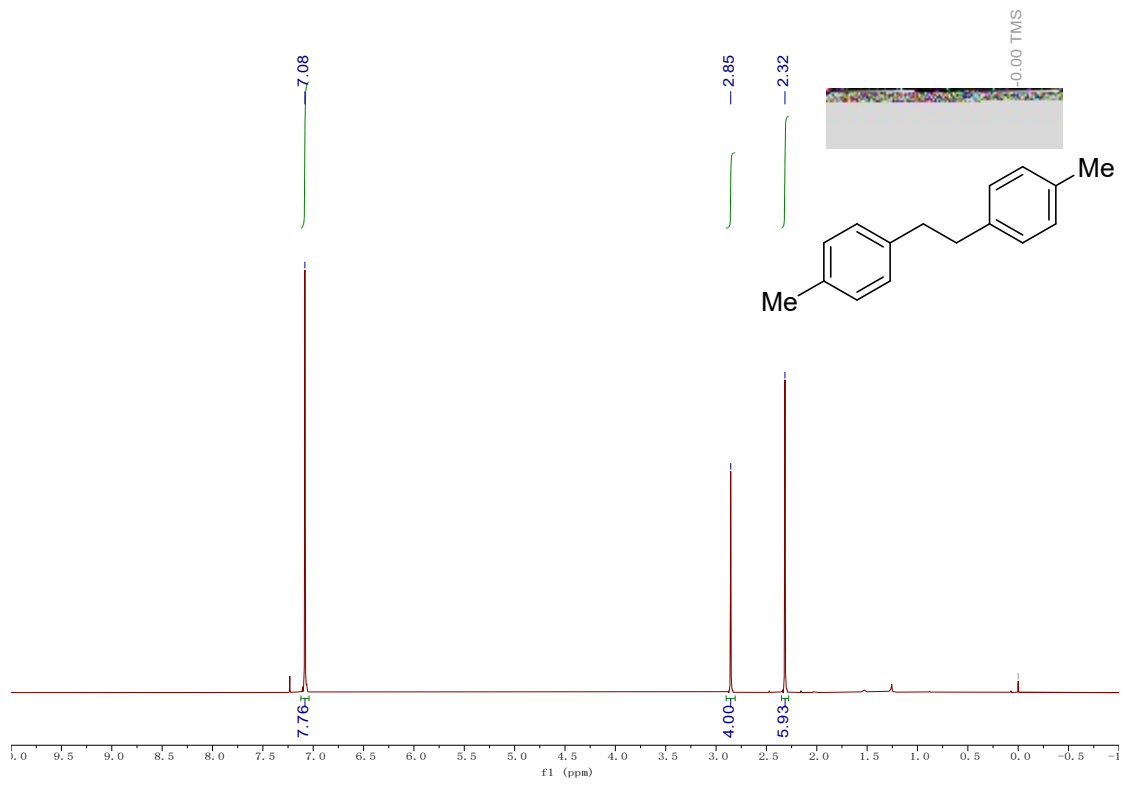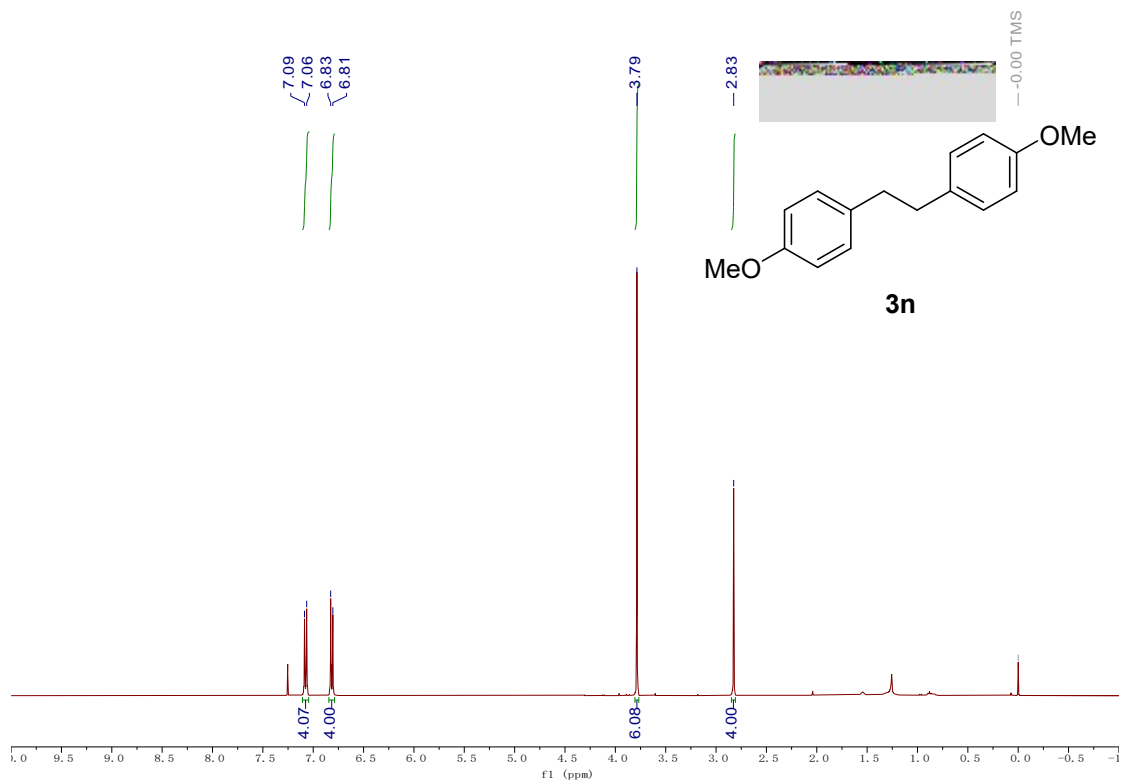

S35

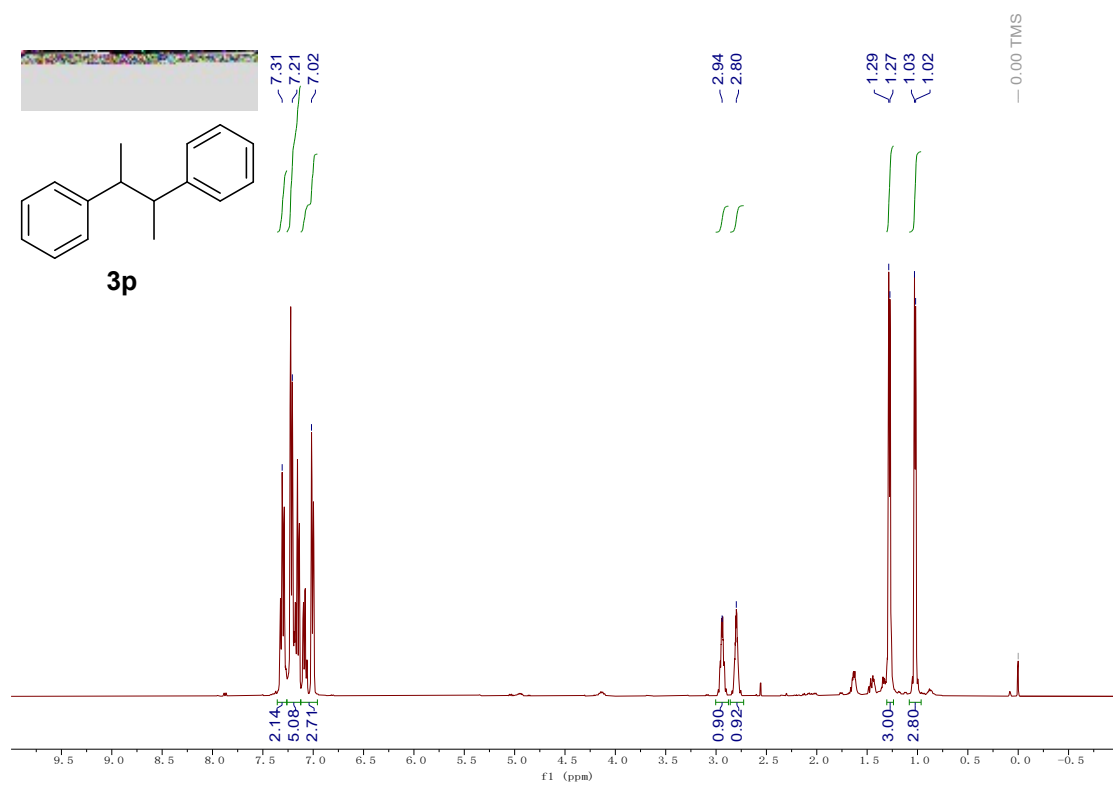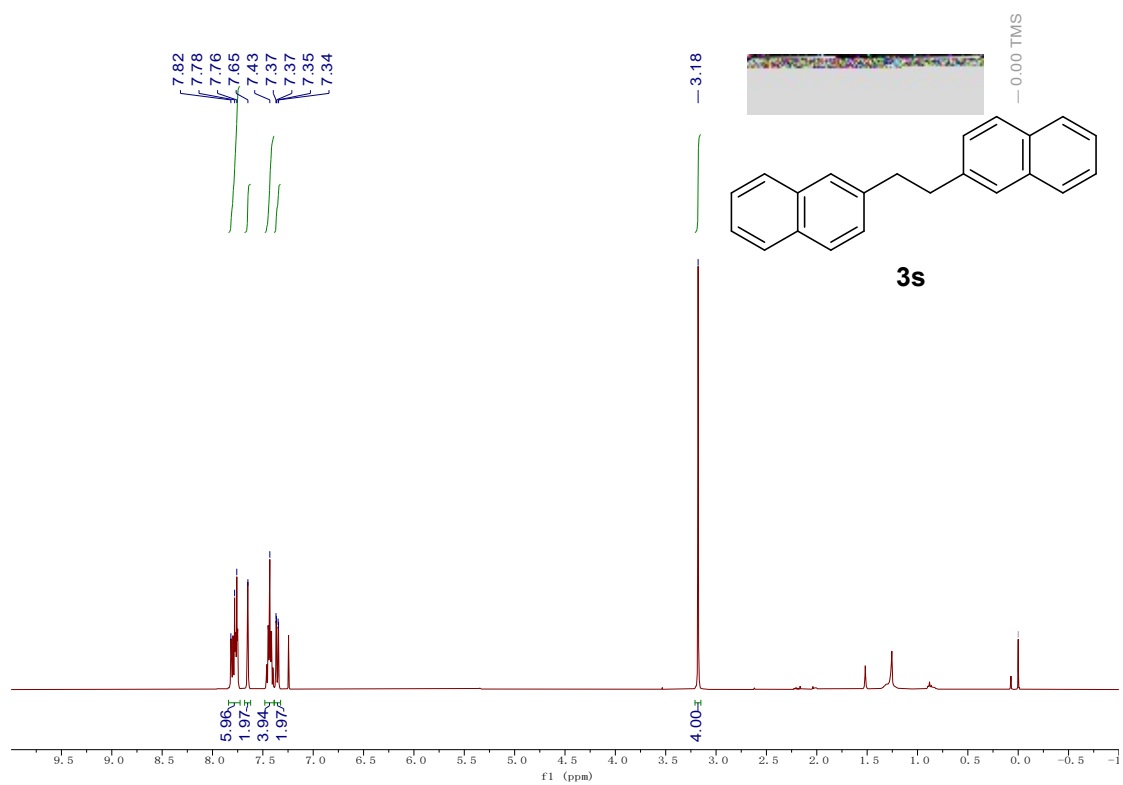

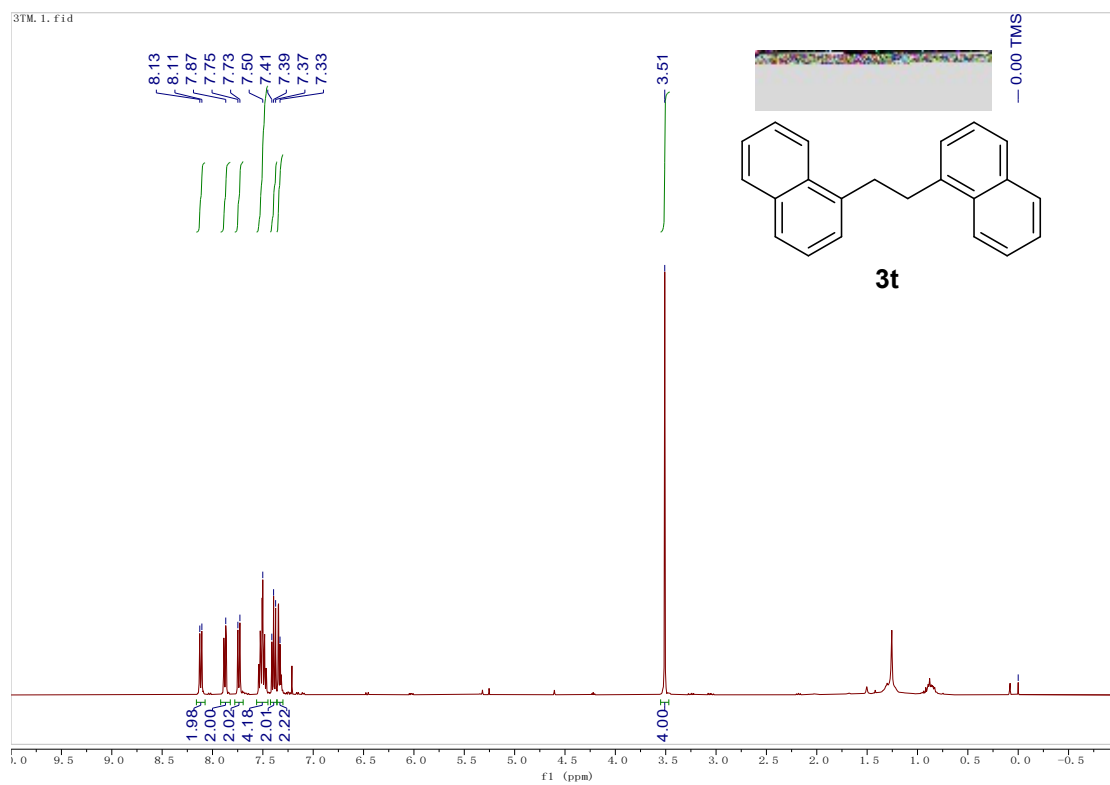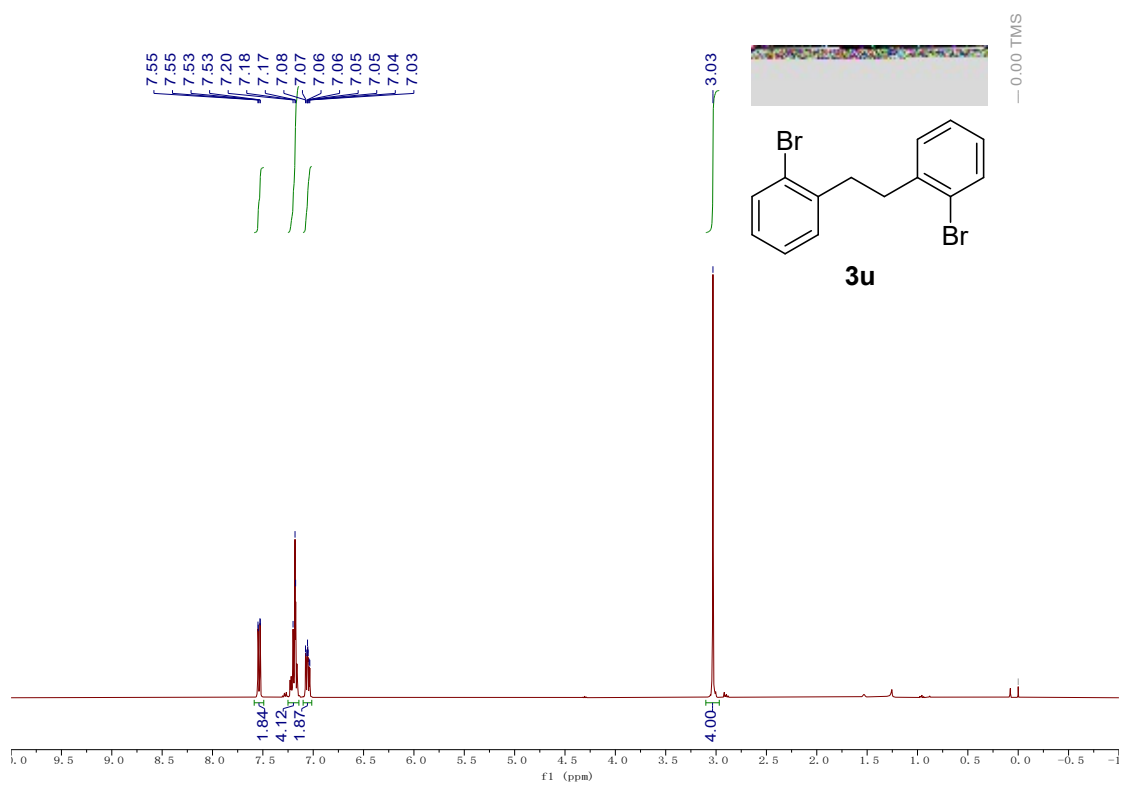

Supplement: d3cc03002d1.pdf [file d3cc03002d1.pdf]
